# Supplementary material
Source: MDPI journal article supplement (https://www.mdpi.com/2673-9623/4/1/3)
Supplement: s1 [file s1]

# Supplementary Materials

## Synthesis of thiophene-fused siloles through rhodium-catalyzed *trans*-bis-silylation

Akinobu Naka,<sup>1,\*</sup> Maho Inoue,<sup>1</sup> Haruna Kawabe,<sup>1</sup> and Hisayoshi Kobayashi<sup>2,\*</sup>

<sup>1</sup> Department of Life Science, Kurashiki University of Science and the Arts, Nishinoura, Tsurajima-cho, Kurashiki, Okayama 712-8505, Japan

<sup>2</sup> Professor Emeritus Kyoto Institute of Technology, Matsugasaki, Kyoto 606-8585, Japan

*E-mail addresses:* [anaka@chem.kusa.ac.jp](mailto:anaka@chem.kusa.ac.jp) (A. Naka), [hisabbit@yahoo.co.jp](mailto:hisabbit@yahoo.co.jp) (H. Kobayashi)

### Contents

|                                                                                             |         |
|---------------------------------------------------------------------------------------------|---------|
| 1. NMR Spectra.....                                                                         | S1-S40  |
| 2. Optimized structures for all LM's and TS's for <i>trans</i> -bis-silylation product..... | S41-S50 |

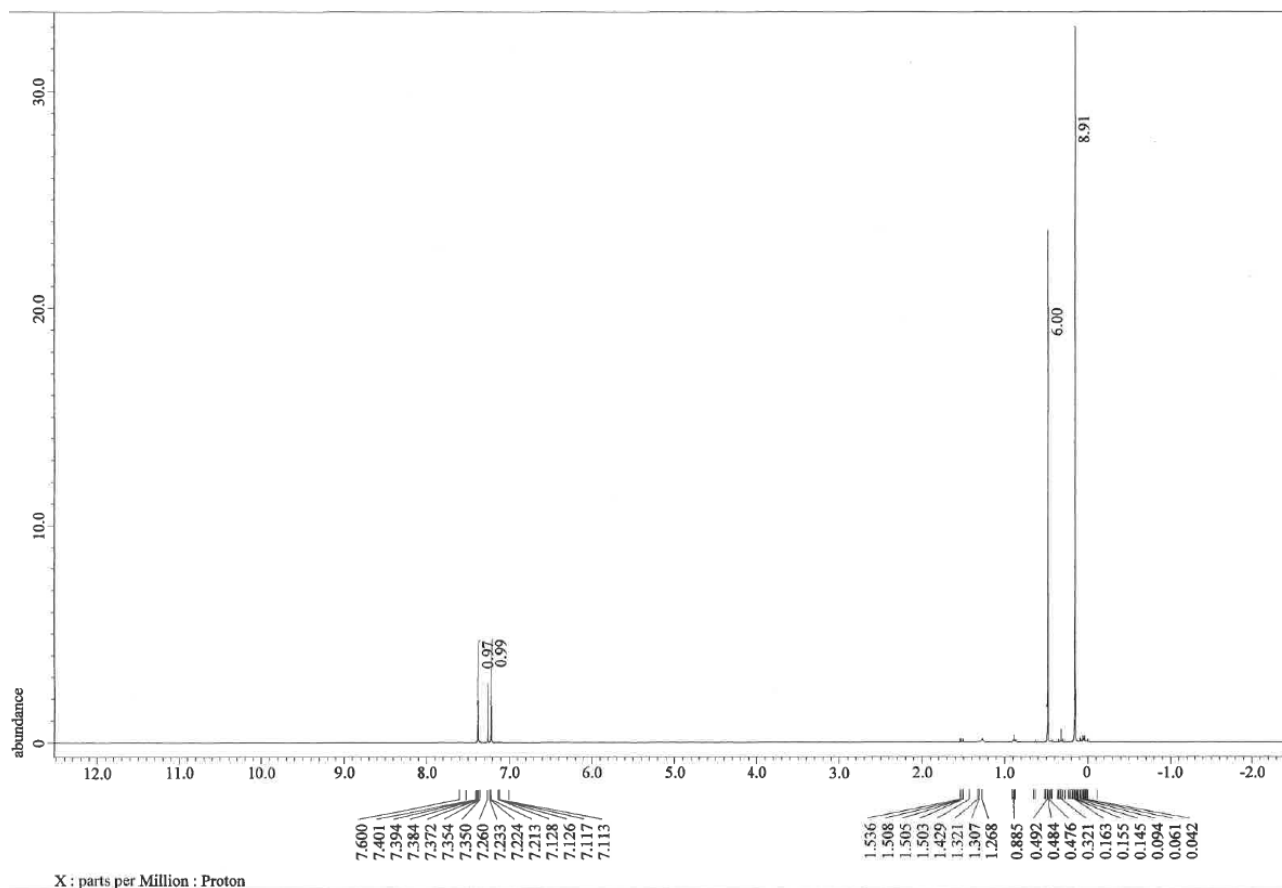

**Figure S1.**  $^1\text{H}$  NMR spectrum of 3-iodo-2-(1,1,2,2,2-pentamethyldisilanyl)thiophene in  $\text{CDCl}_3$ .

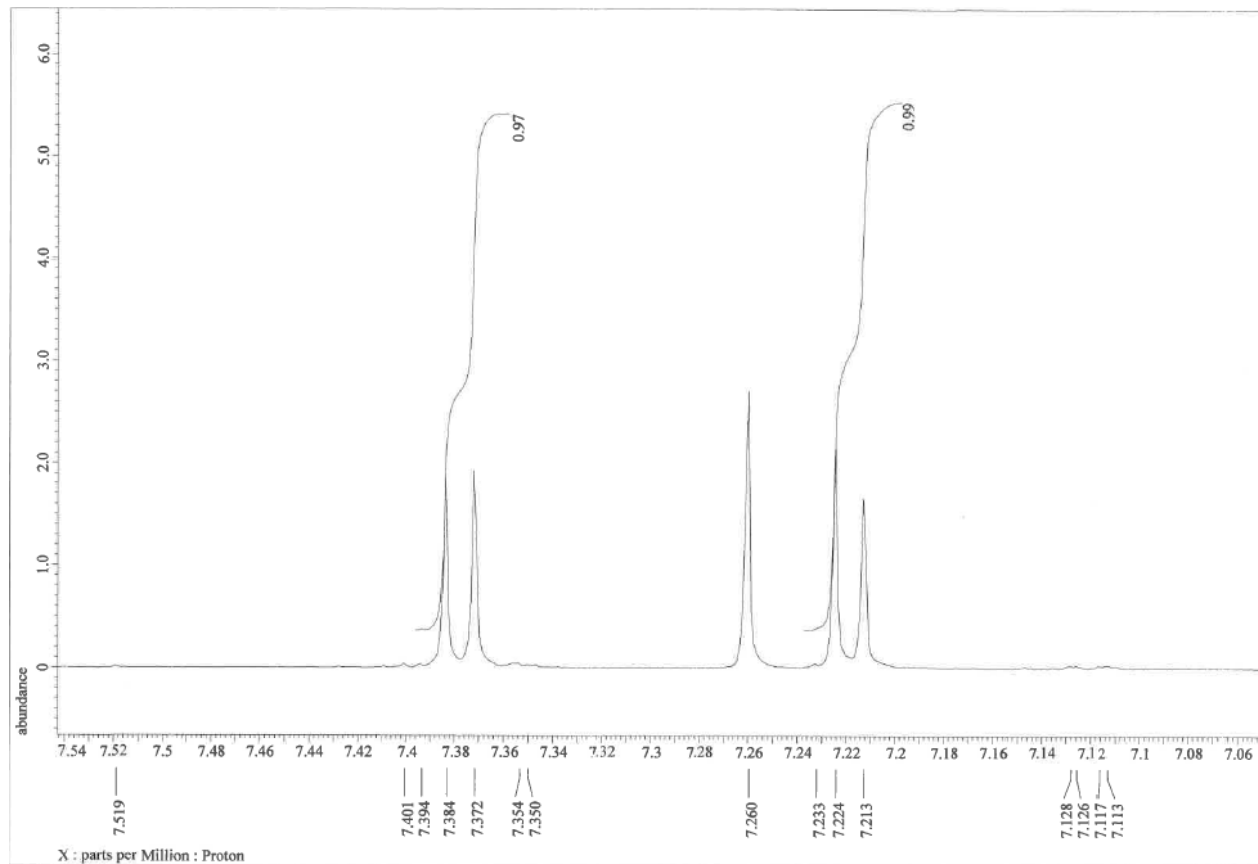

**Figure S2.** Enlarged view of the aromatic region for 3-iodo-2-(1,1,2,2,2-pentamethyldisilanyl)thiophene in  $\text{CDCl}_3$ .

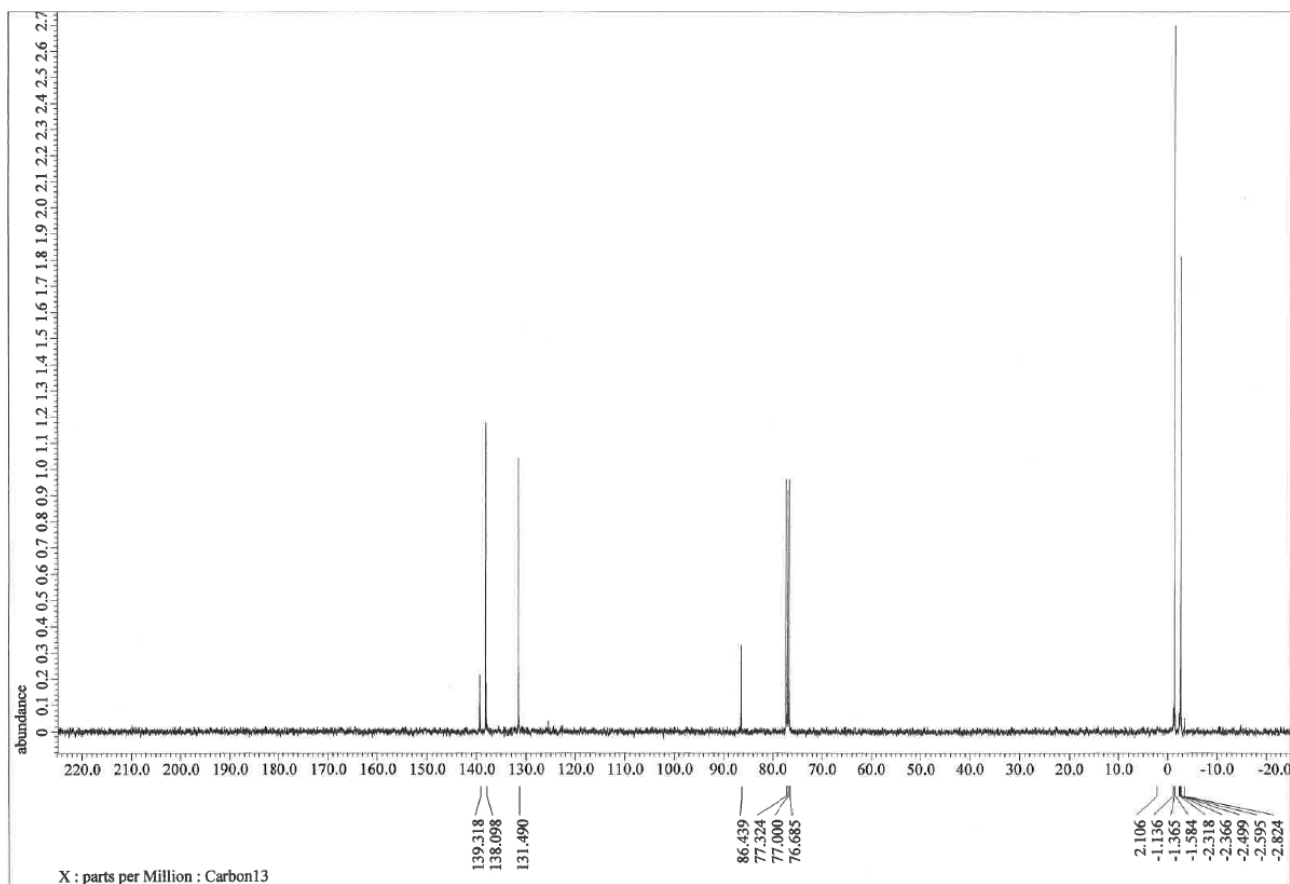

**Figure S3.** <sup>13</sup>C NMR spectrum of 3-iodo-2-(1,1,2,2,2-pentamethyldisilanyl)thiophene in CDCl<sub>3</sub>.

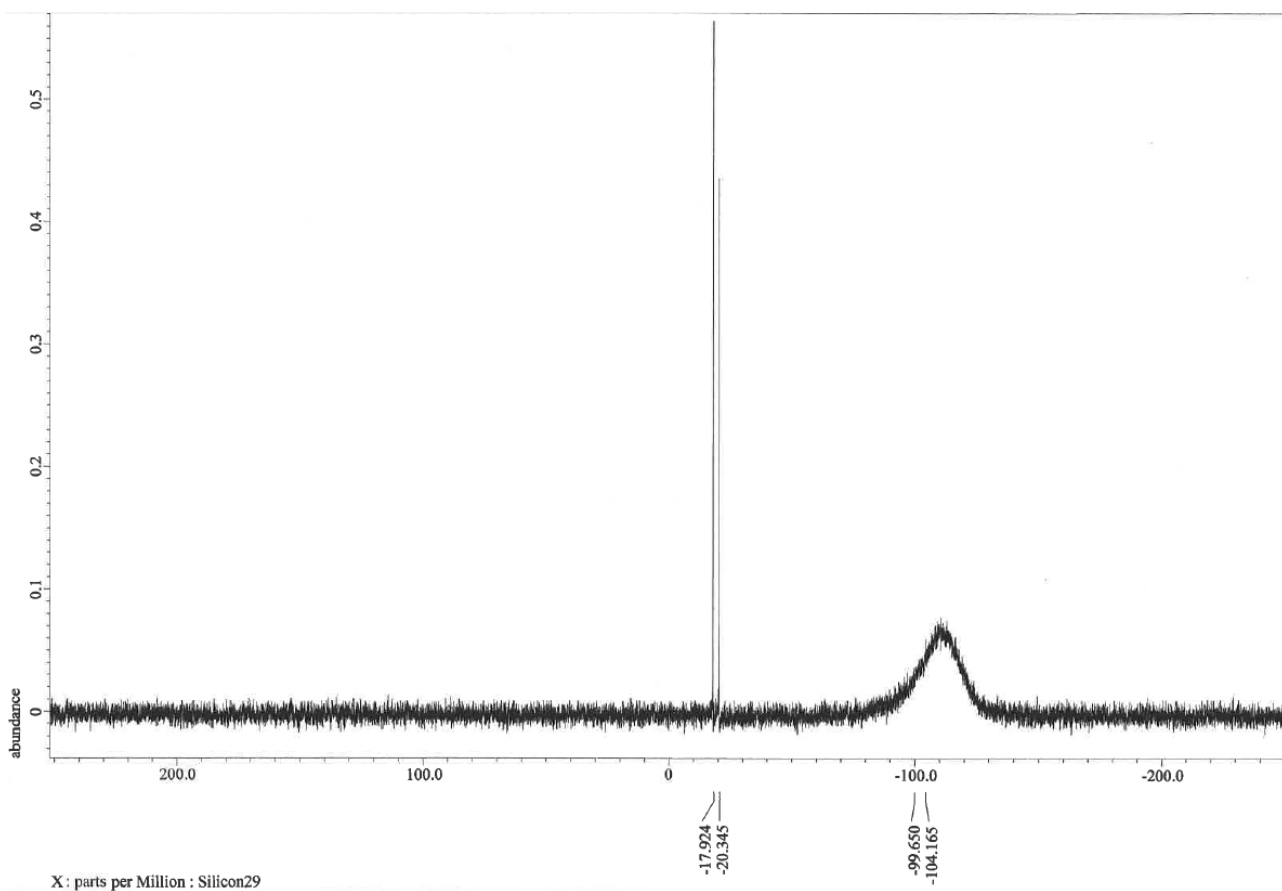

**Figure S4.** <sup>29</sup>Si NMR spectrum of 3-iodo-2-(1,1,2,2,2-pentamethyldisilanyl)thiophene in CDCl<sub>3</sub>.

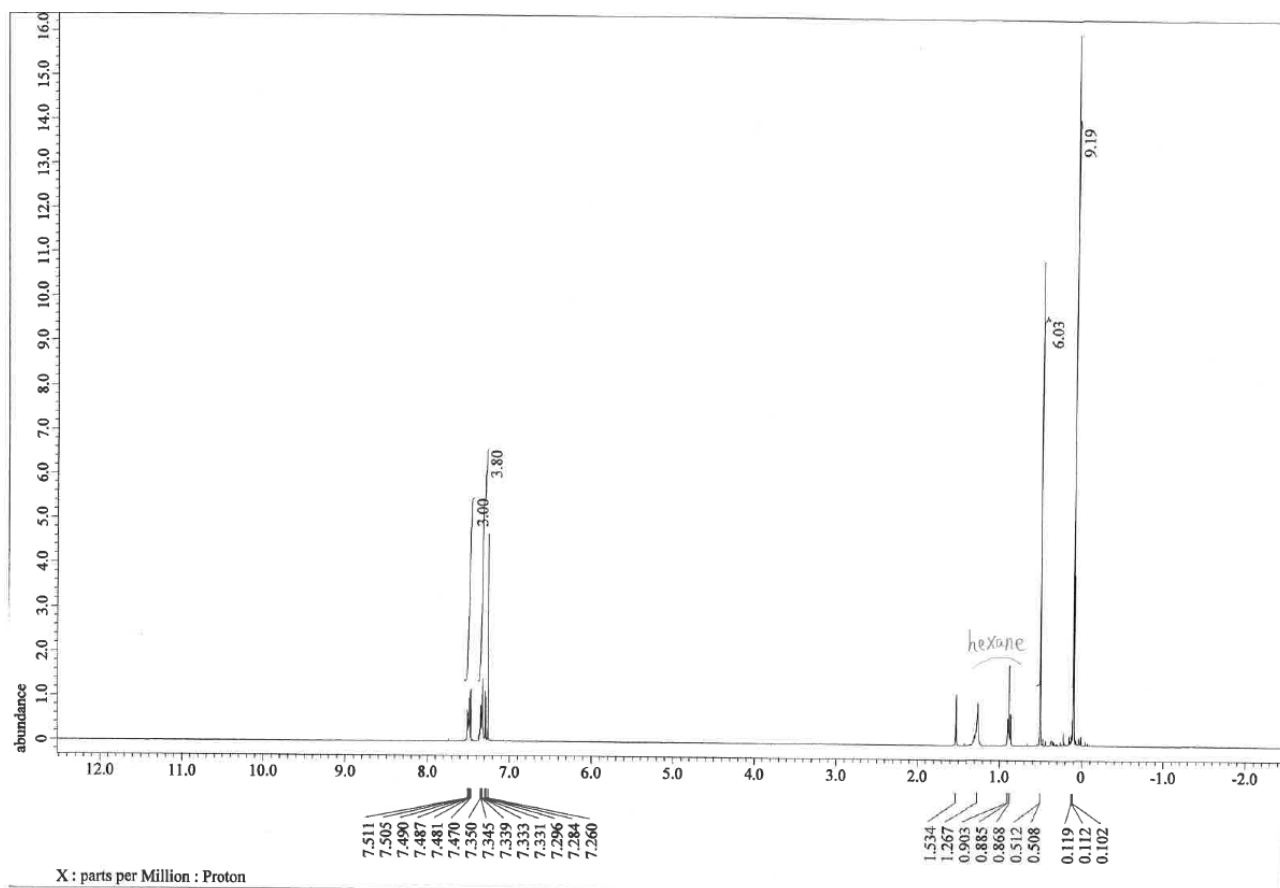

Figure S5.  $^1\text{H}$  NMR spectrum of **1a** in  $\text{CDCl}_3$ .

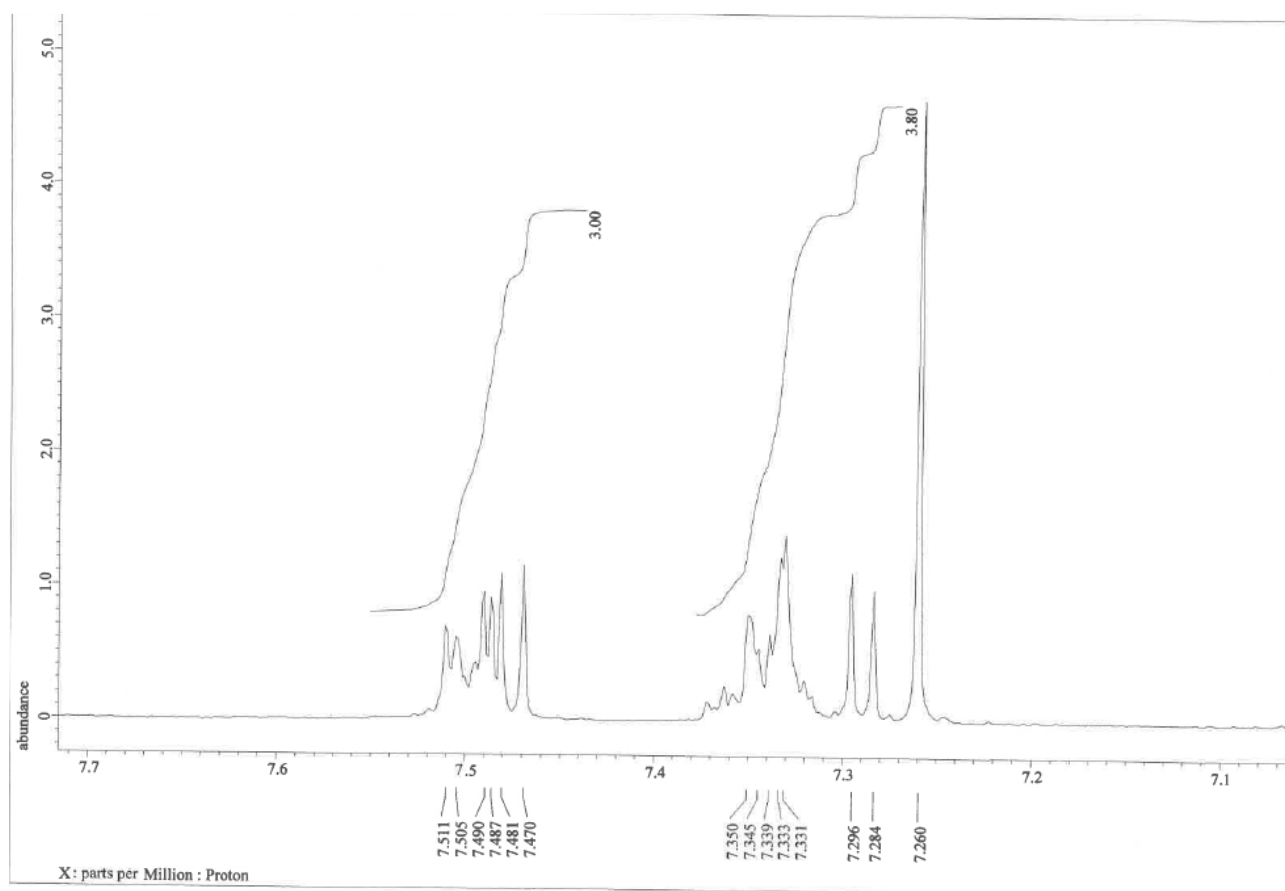

Figure S6. Enlarged view of the aromatic region for **1a**.

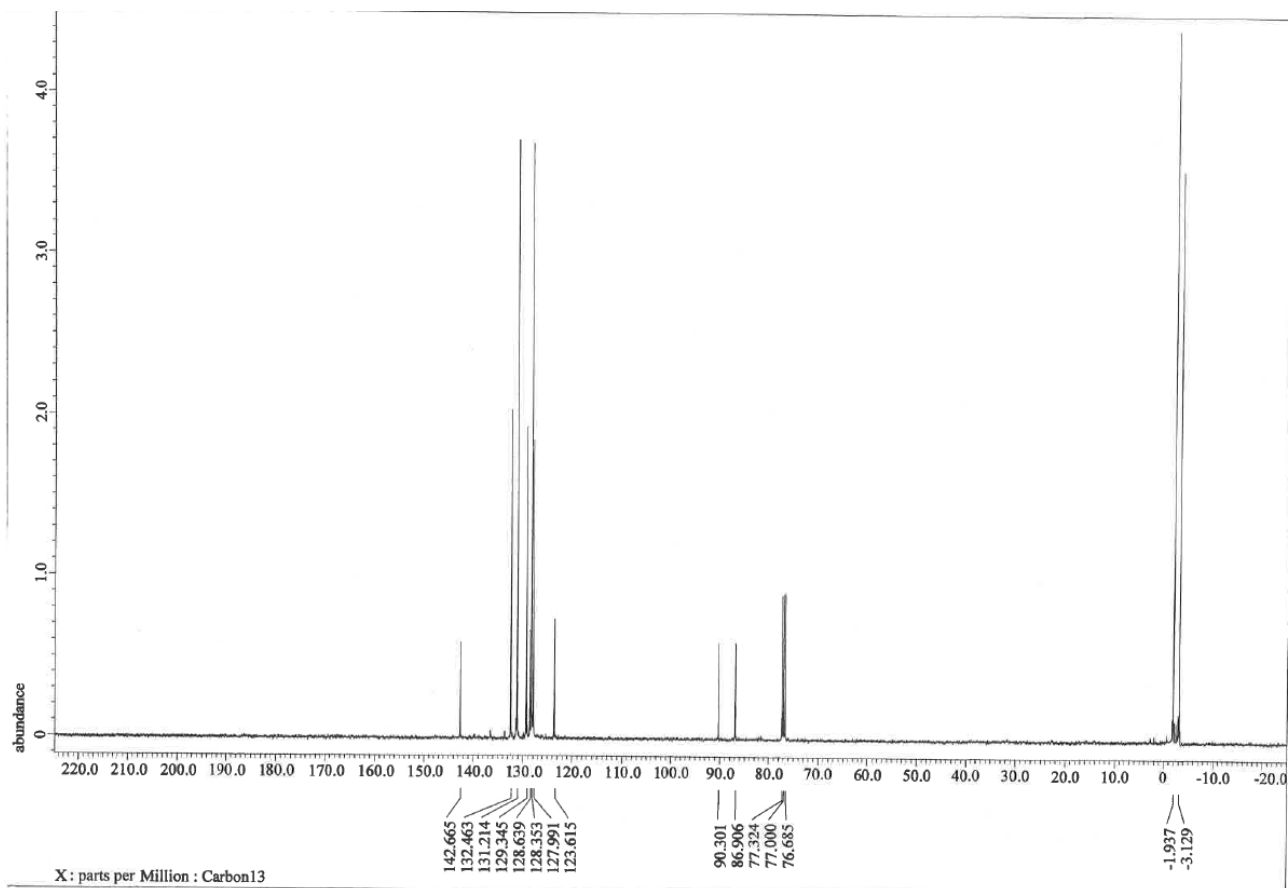

**Figure S7.**  $^{13}\text{C}$  NMR spectrum of **1a** in  $\text{CDCl}_3$ .

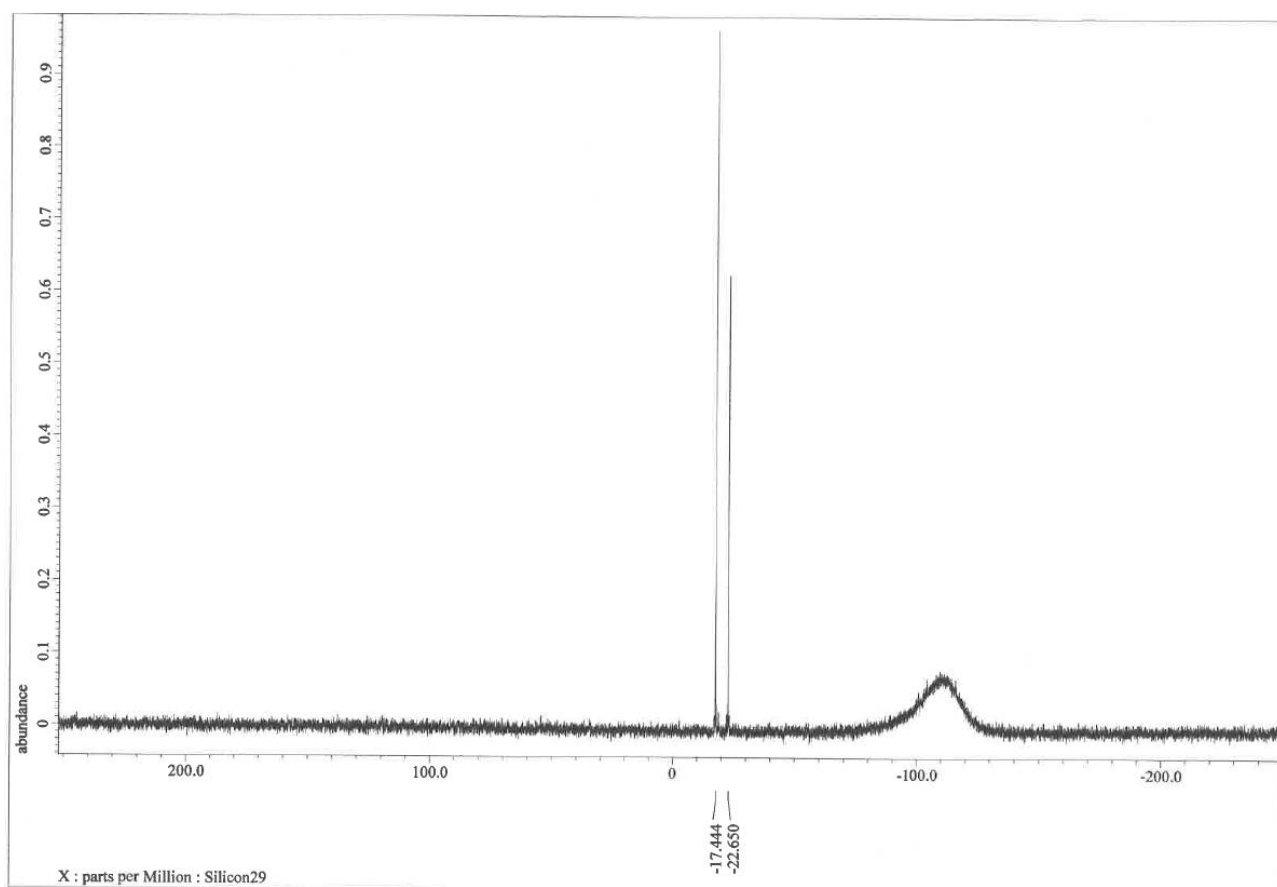

**Figure S8.**  $^{29}\text{Si}$  NMR spectrum of **1a** in  $\text{CDCl}_3$ .

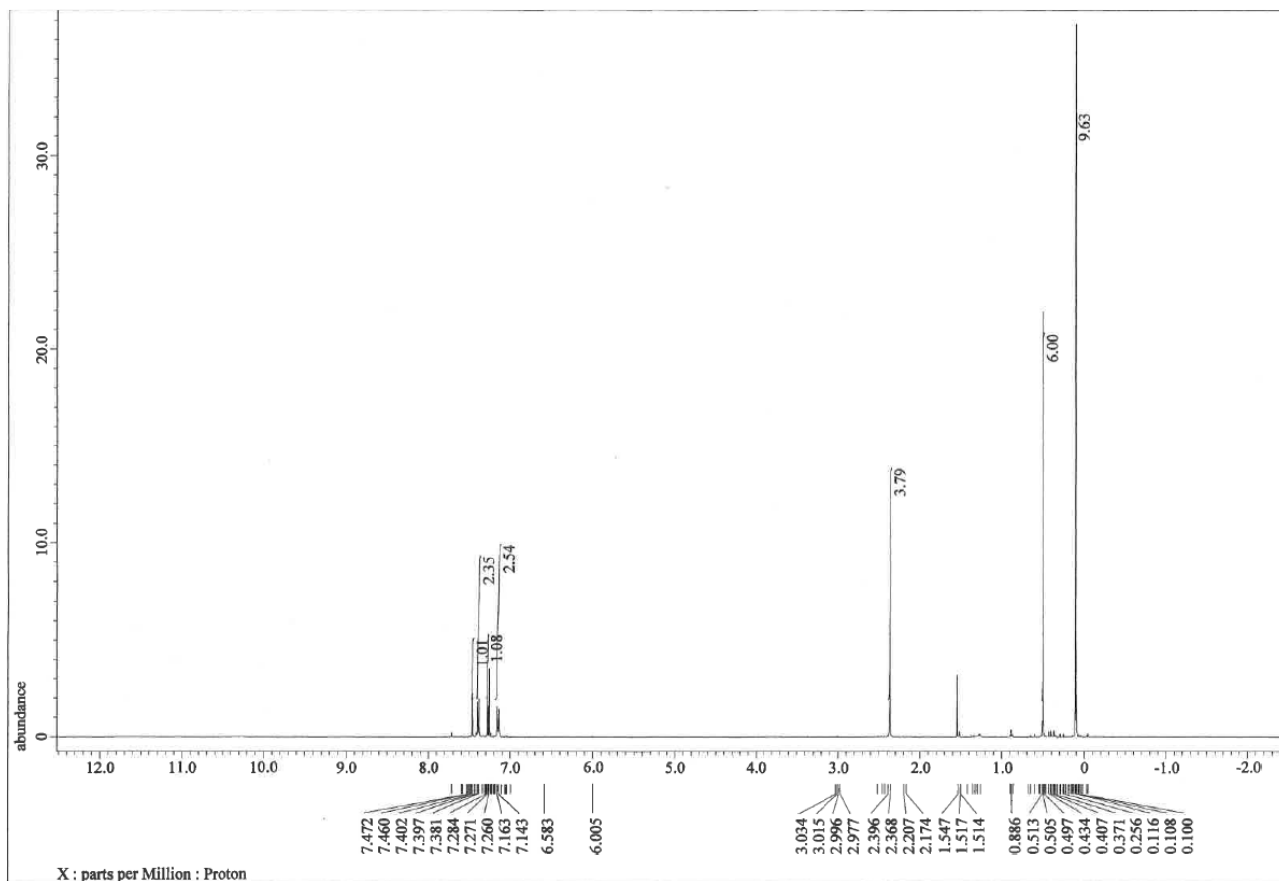

Figure S9.  $^1\text{H}$  NMR spectrum of **1b** in  $\text{CDCl}_3$ .

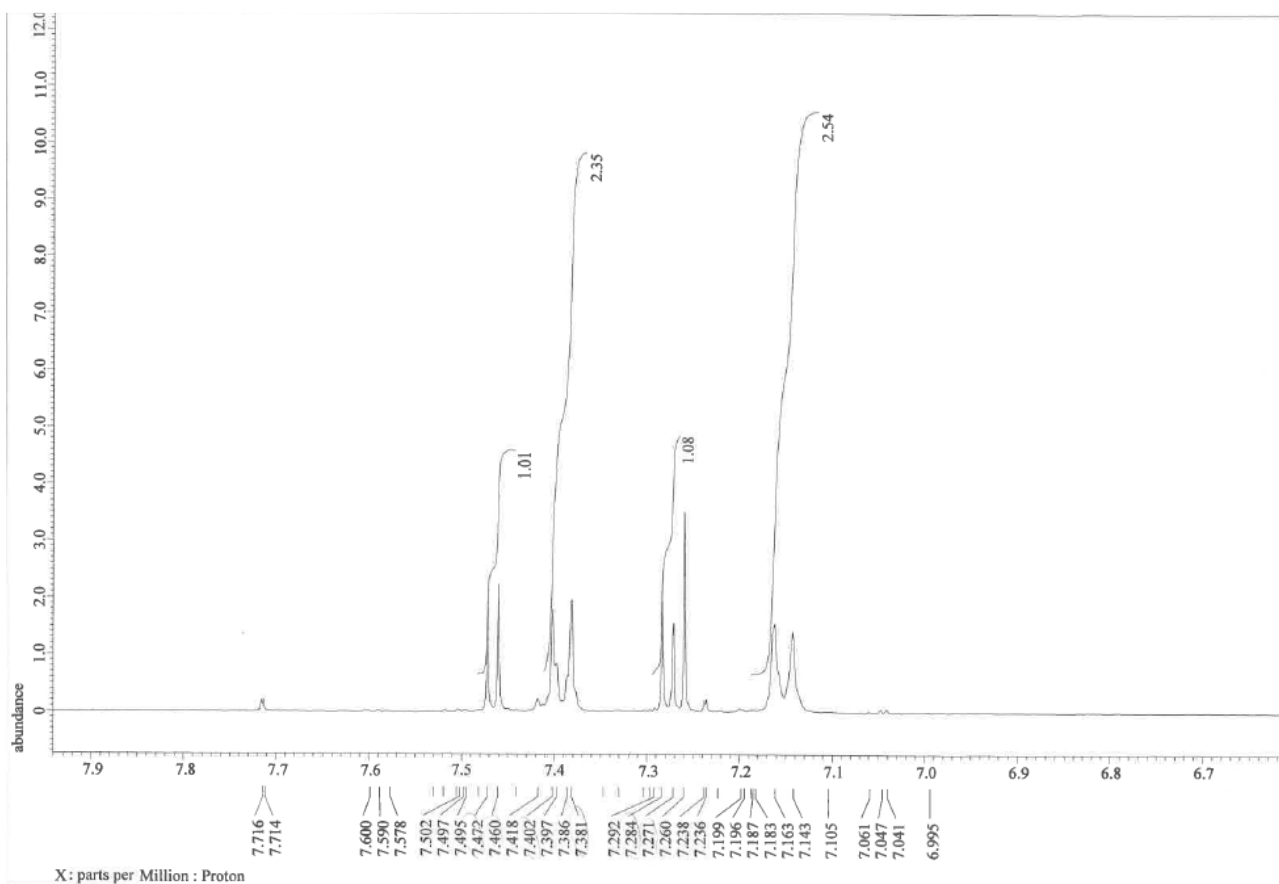

Figure S10. Enlarged view of the aromatic region for **1b**.

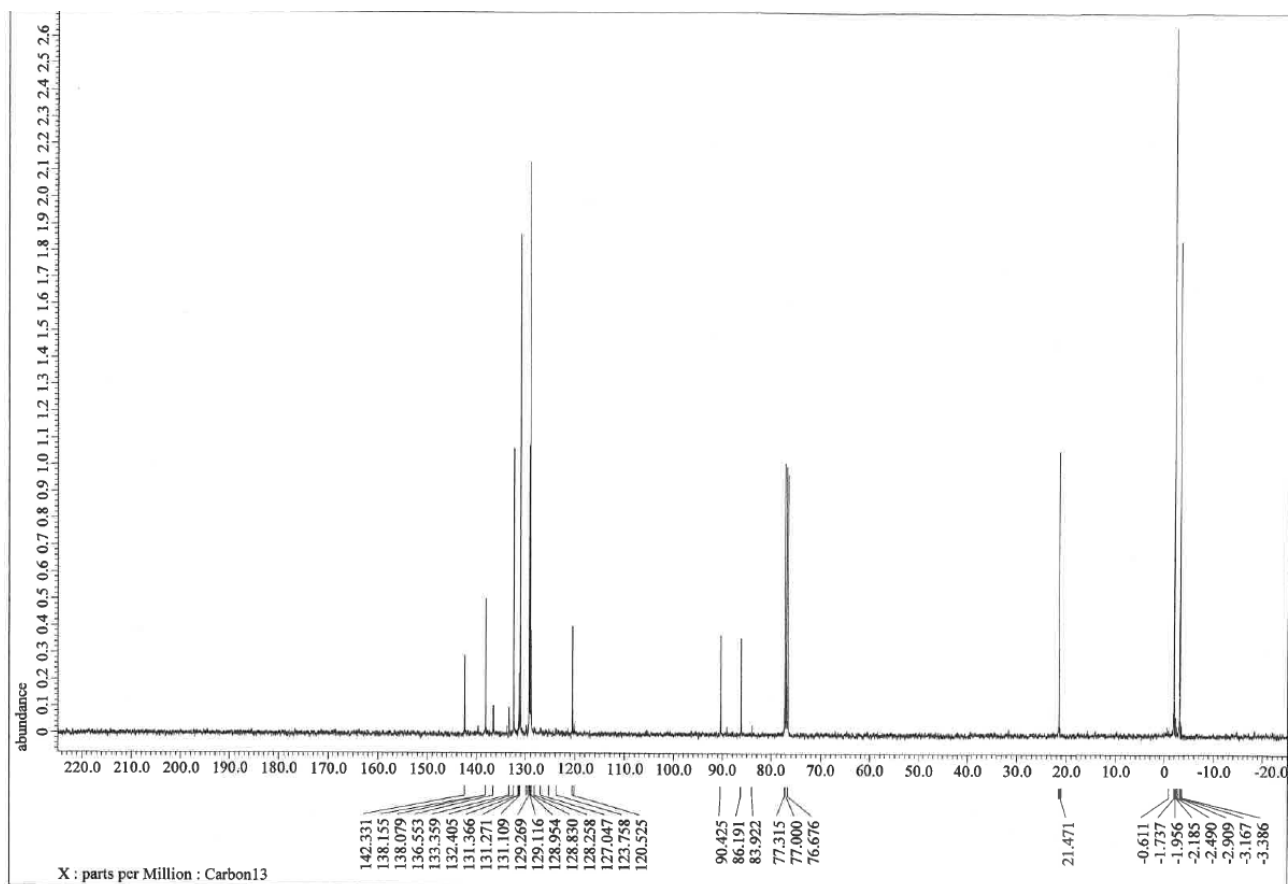

Figure S11.  $^{13}\text{C}$  NMR spectrum of **1b** in  $\text{CDCl}_3$ .

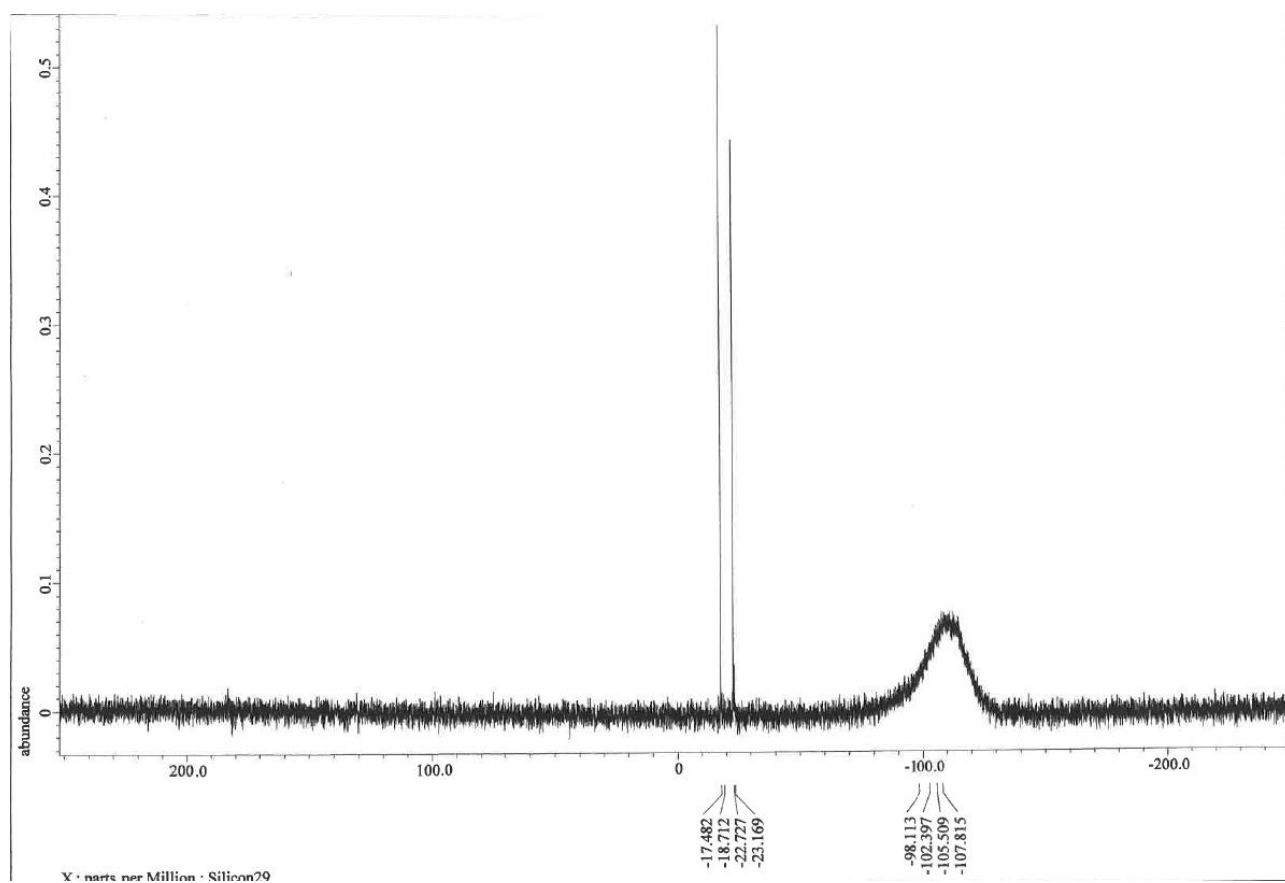

Figure S12.  $^{29}\text{Si}$  NMR spectrum of **1b** in  $\text{CDCl}_3$ .

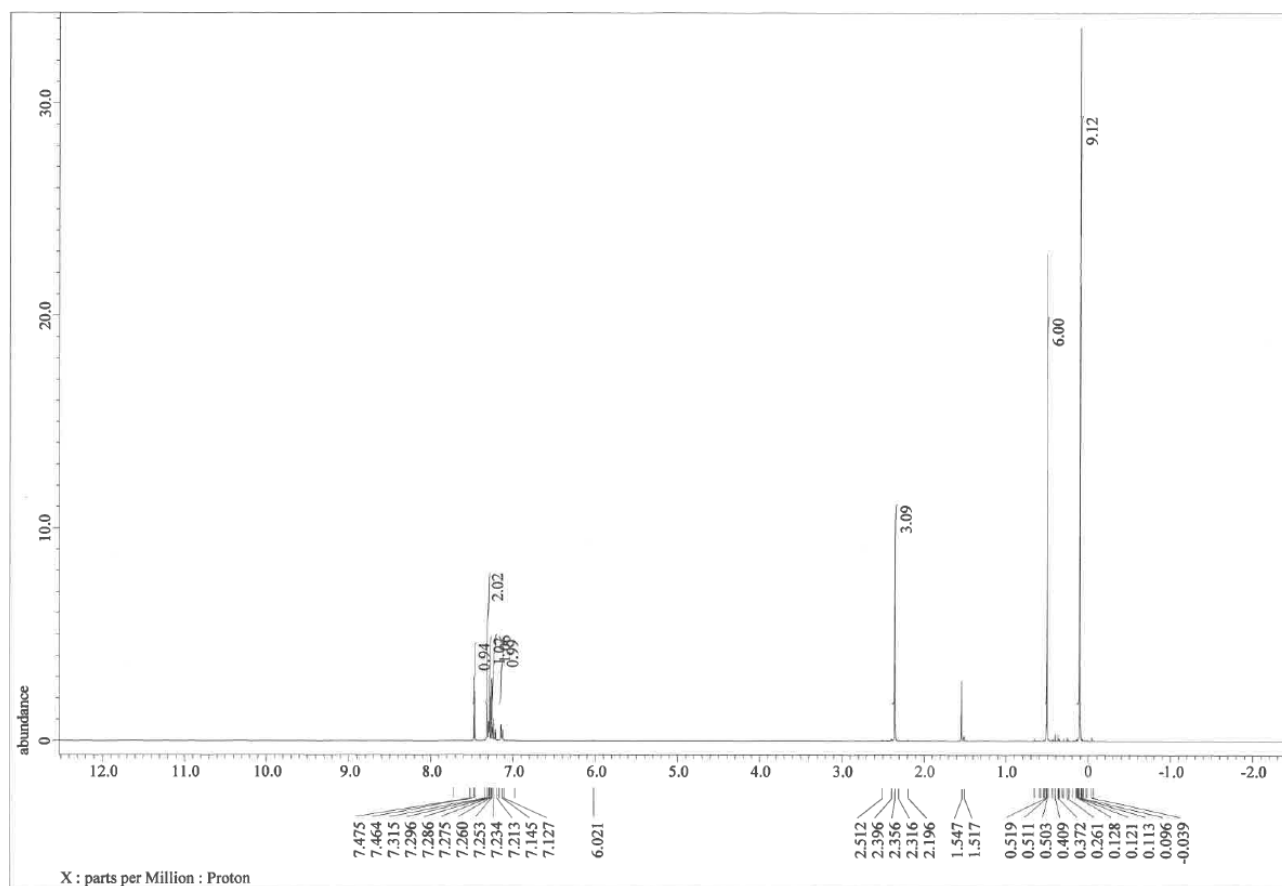

**Figure S13.**  $^1\text{H}$  NMR spectrum of **1c** in  $\text{CDCl}_3$ .

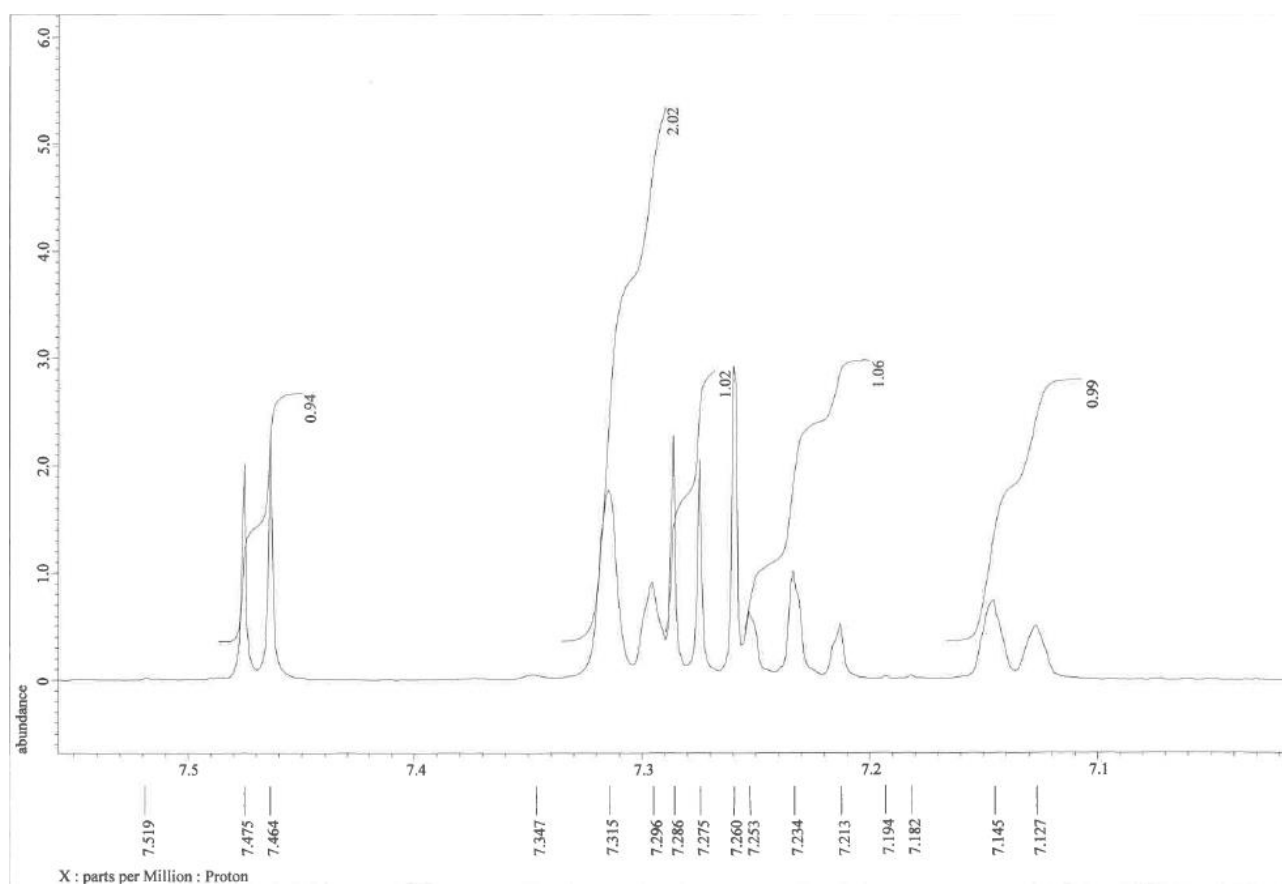

**Figure S14.** Enlarged view of the aromatic region for **1c**.



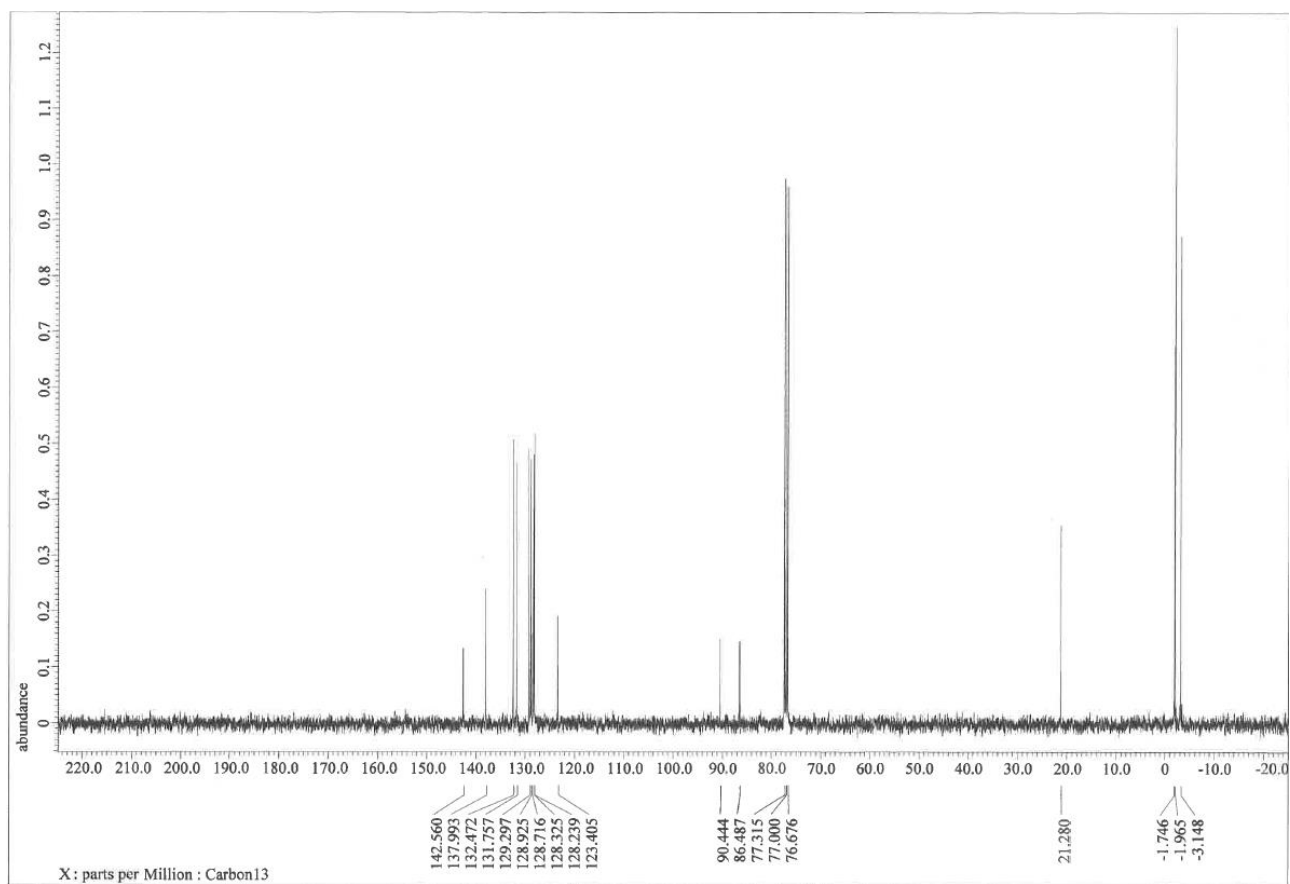

**Figure S15.** <sup>13</sup>C NMR spectrum of **1c** in CDCl<sub>3</sub>.

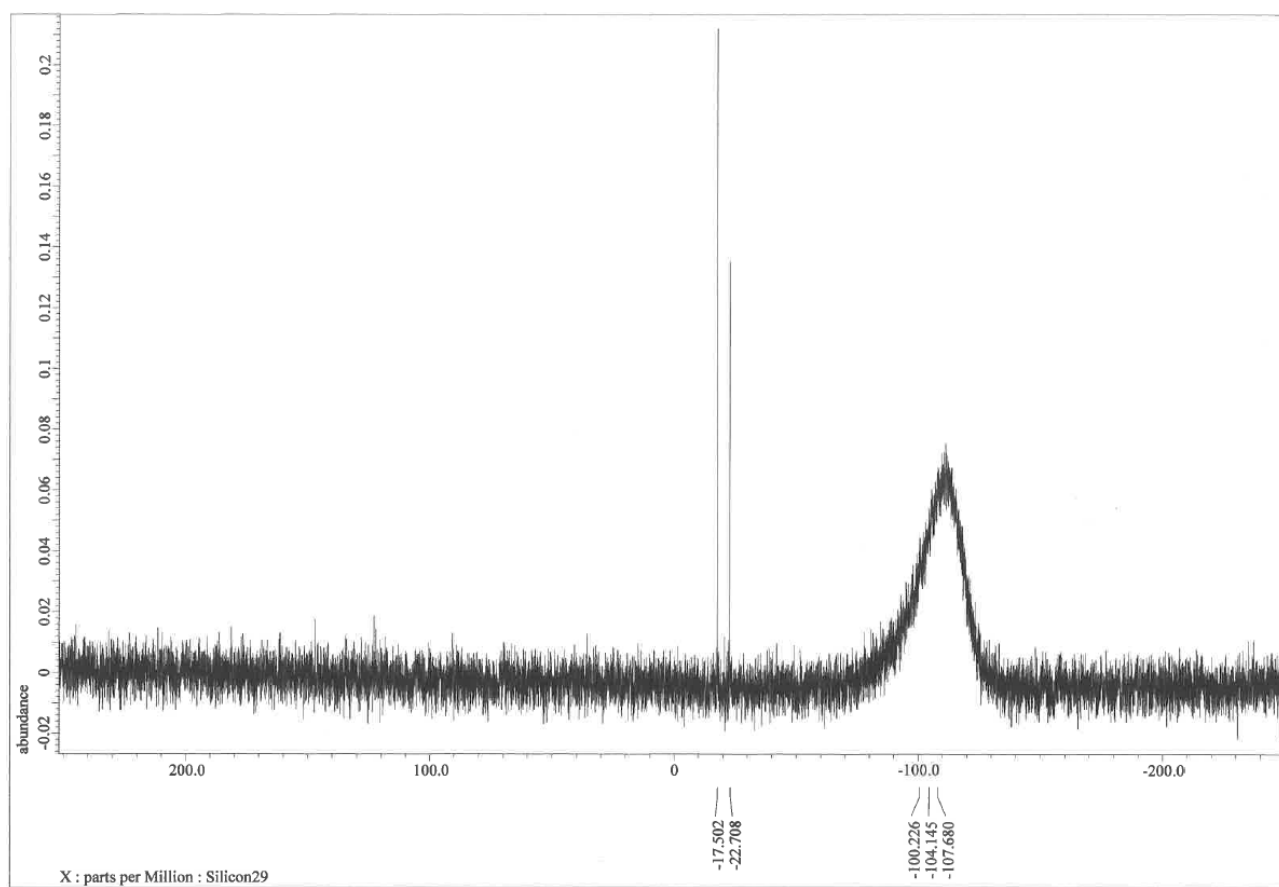

**Figure S16.** <sup>29</sup>Si NMR spectrum of **1c** in CDCl<sub>3</sub>.

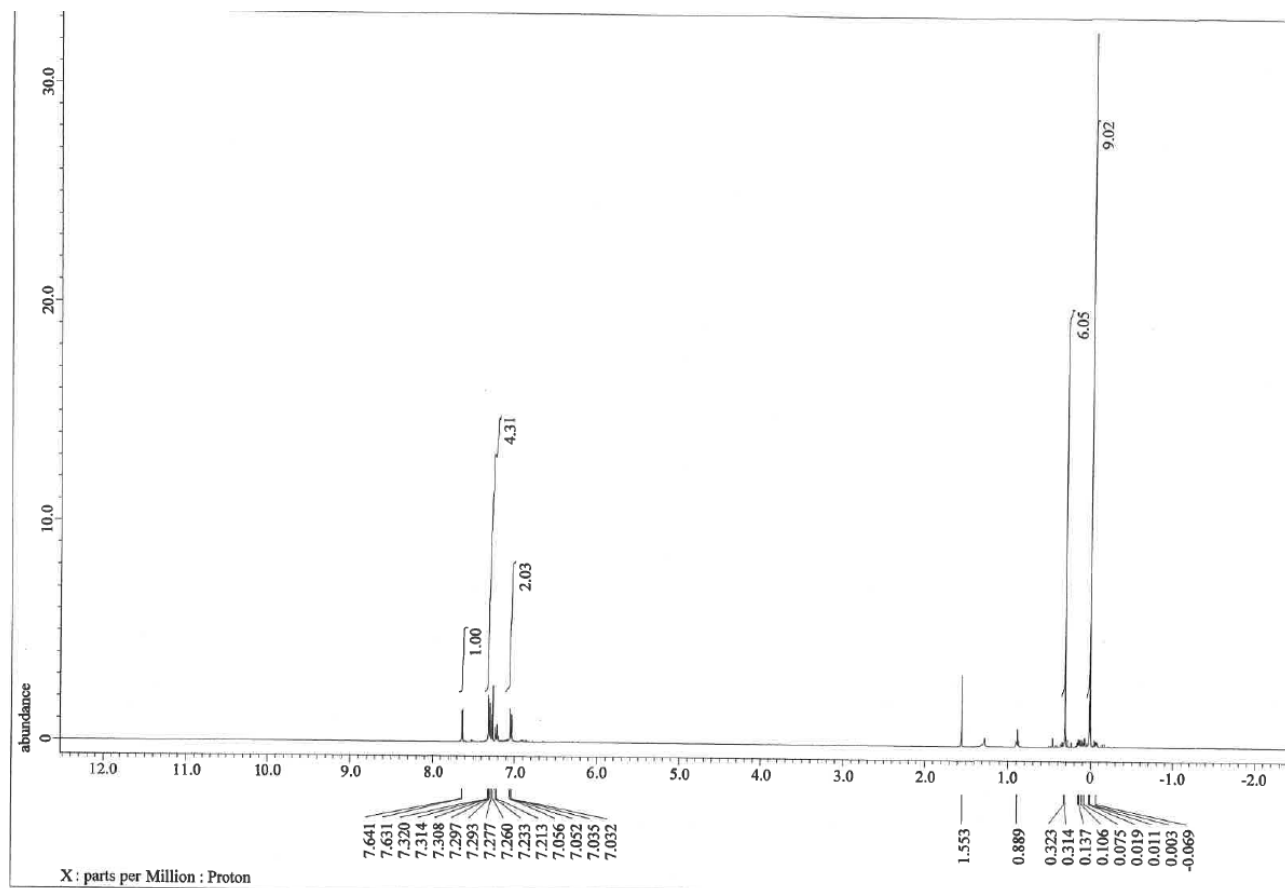

Figure S17.  $^1\text{H}$  NMR spectrum of **2a** in  $\text{CDCl}_3$ .

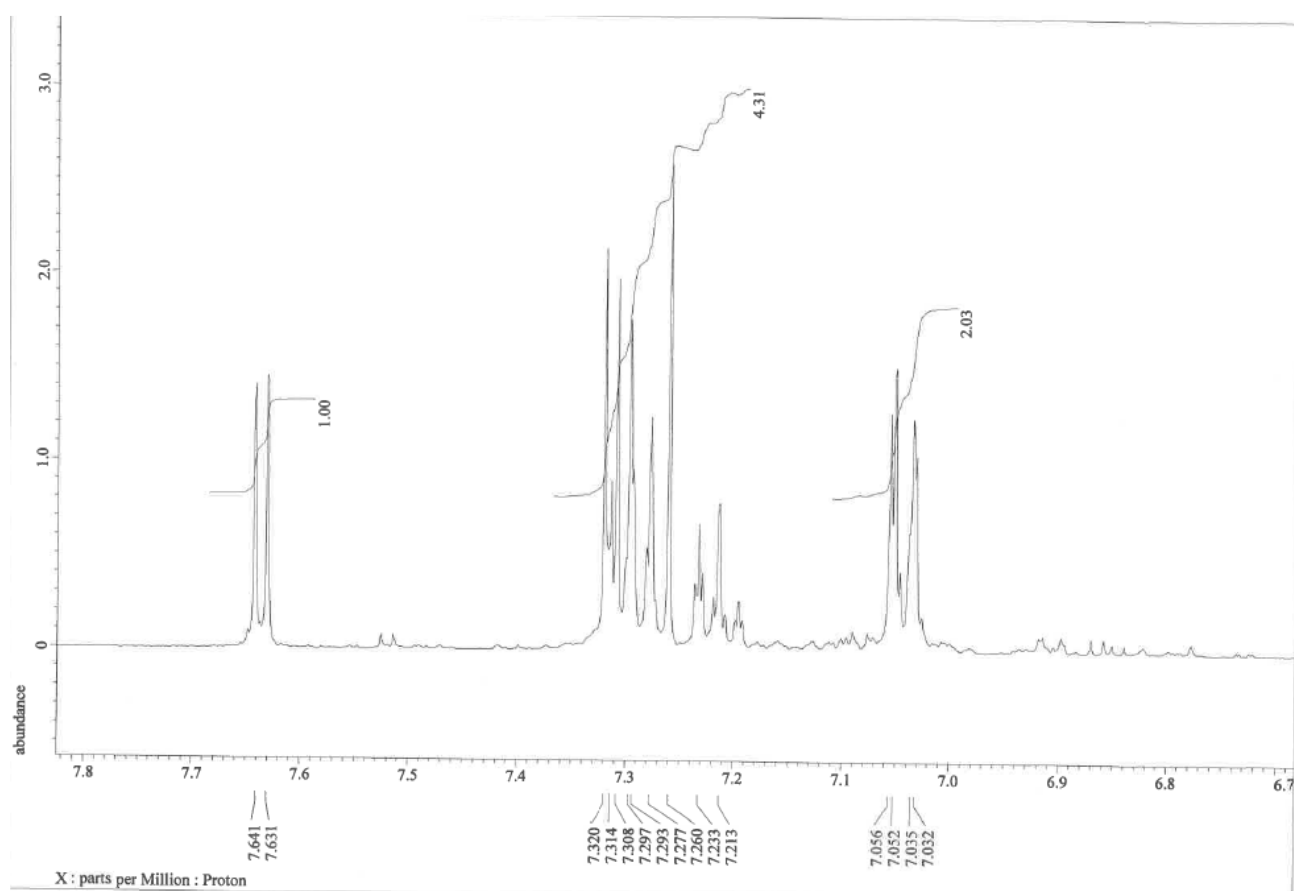

Figure S18. Enlarged view of the aromatic region for **2a**.

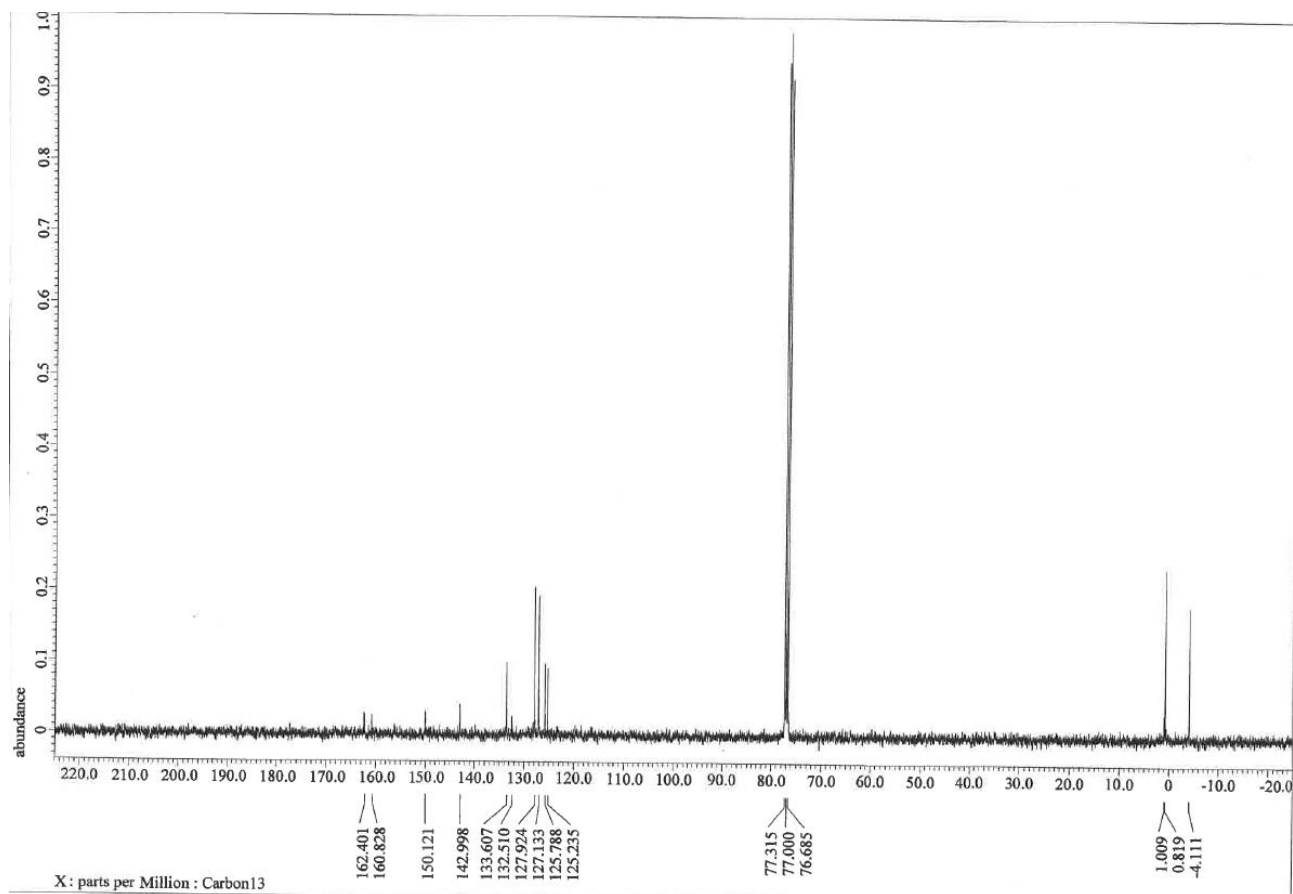

Figure S19. <sup>13</sup>C NMR spectrum of **2a** in CDCl<sub>3</sub>.

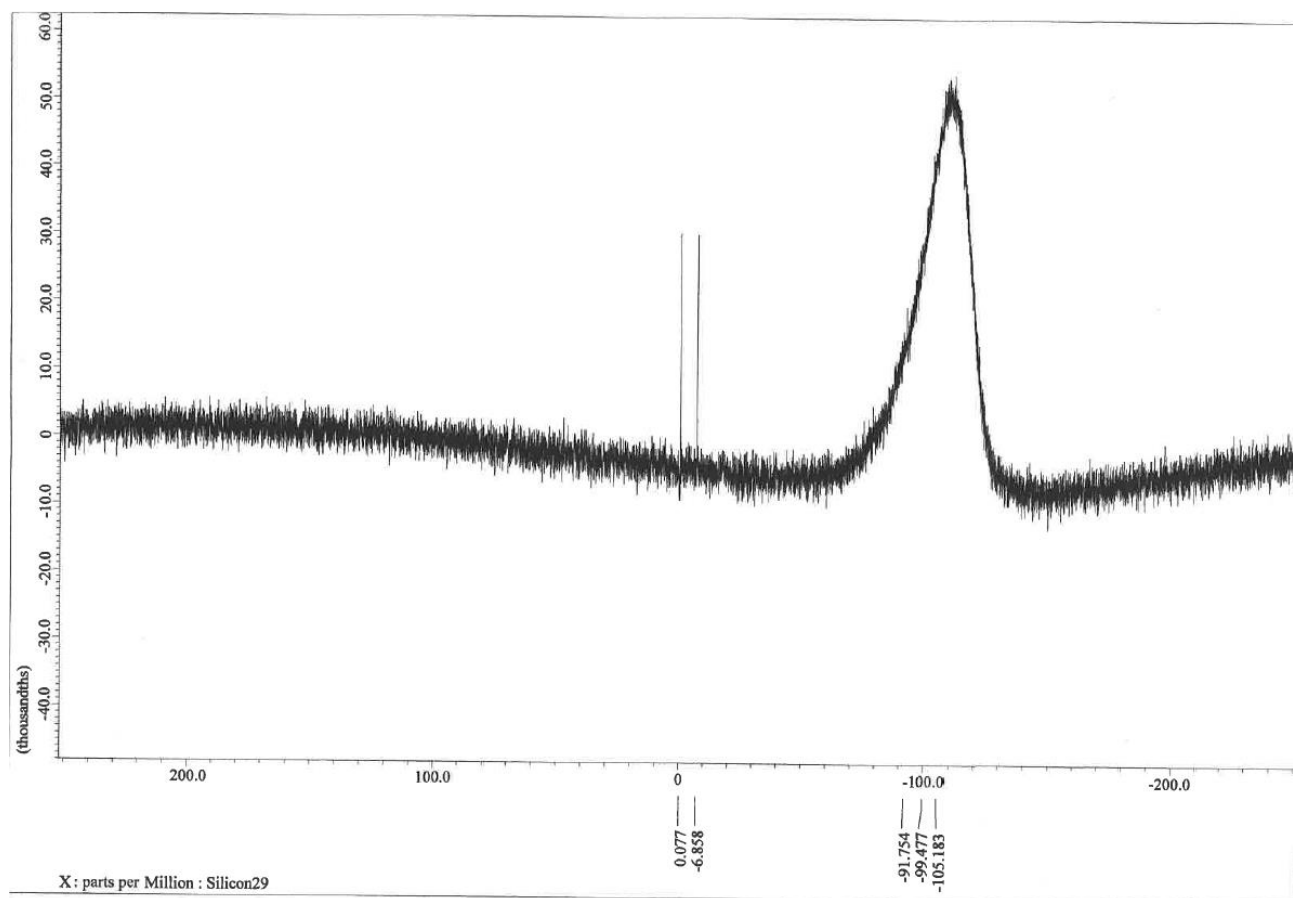

Figure S20. <sup>29</sup>Si NMR spectrum of **2a** in CDCl<sub>3</sub>.

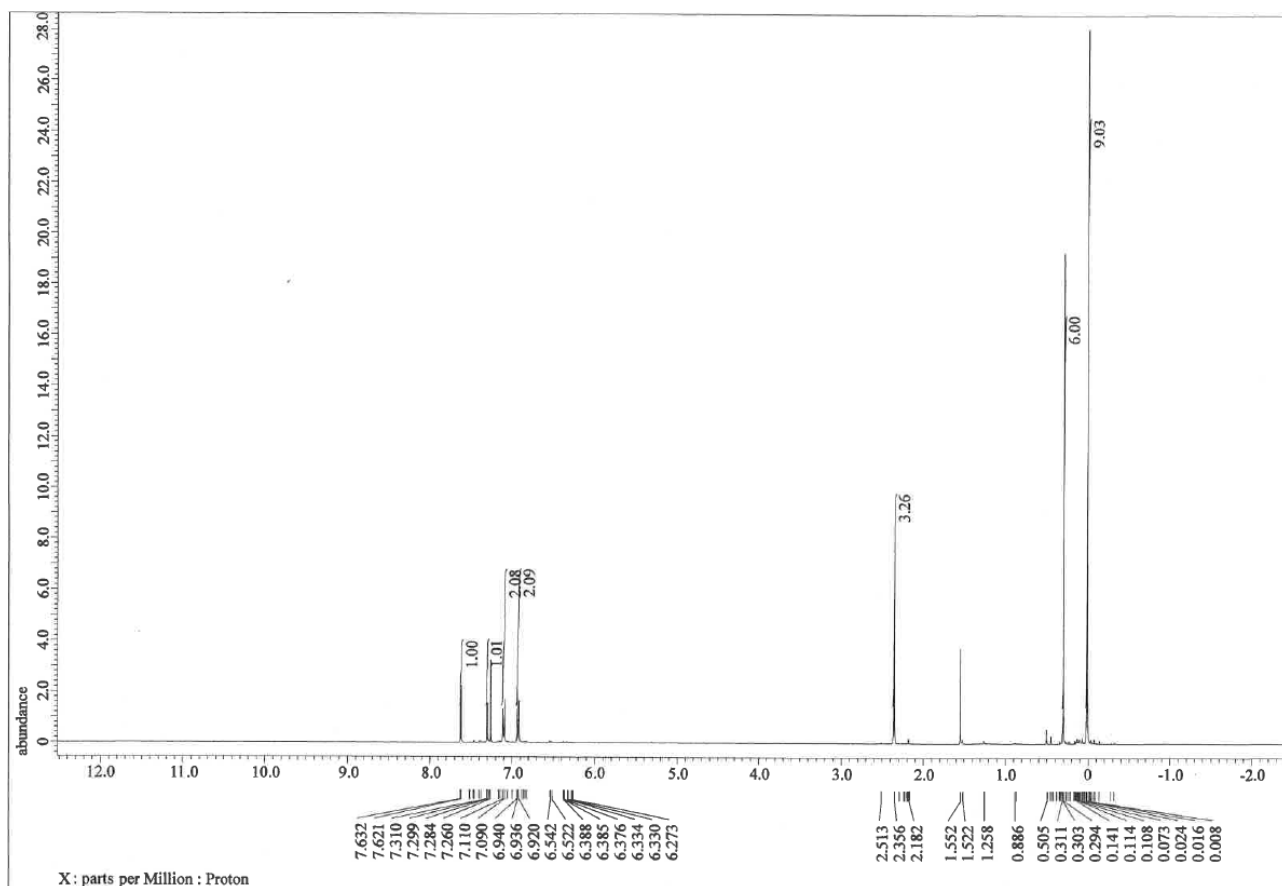

Figure S21.  $^1\text{H}$  NMR spectrum of **2b** in  $\text{CDCl}_3$ .

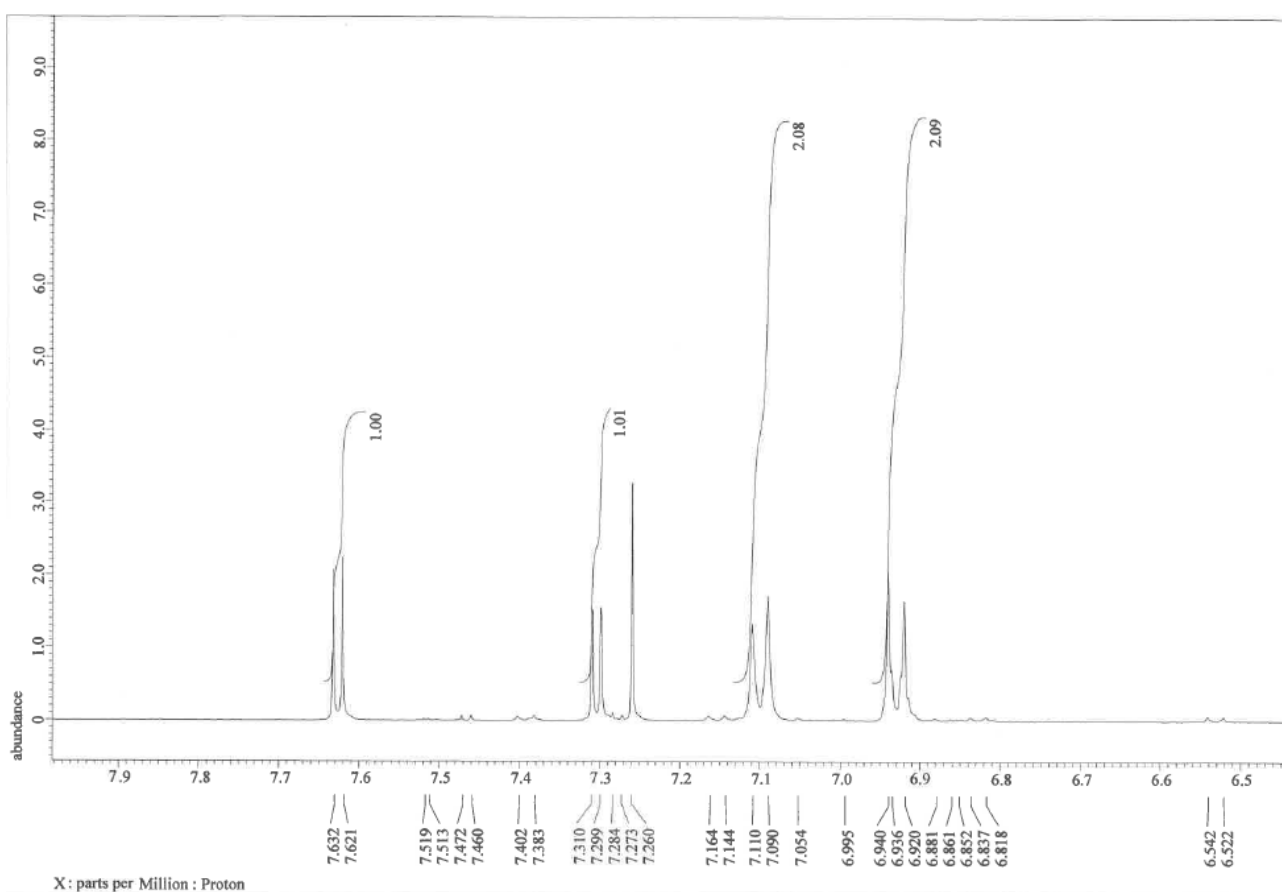

Figure S22. Enlarged view of the aromatic region for **2b**.

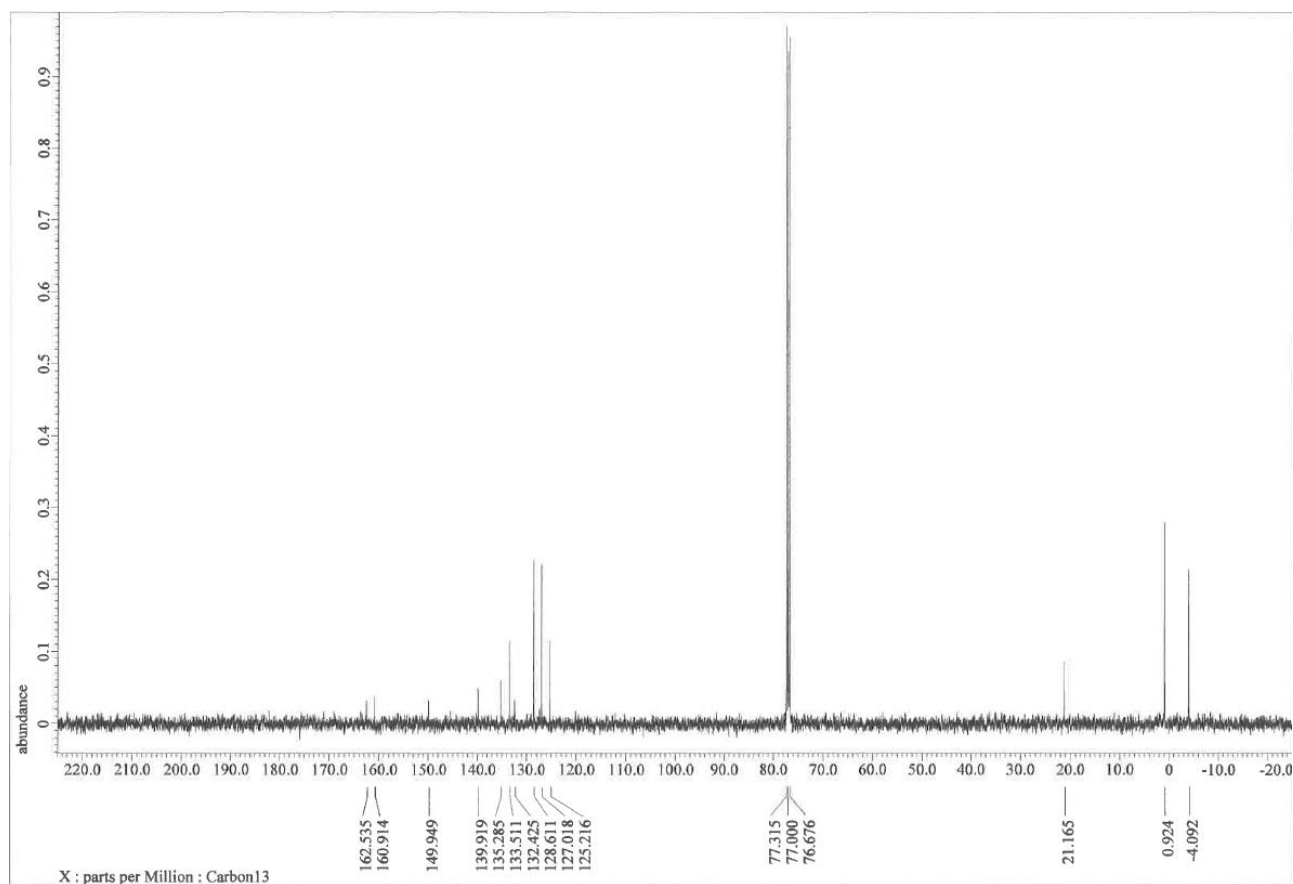

Figure S23. <sup>13</sup>C NMR spectrum of **2b** in CDCl<sub>3</sub>.

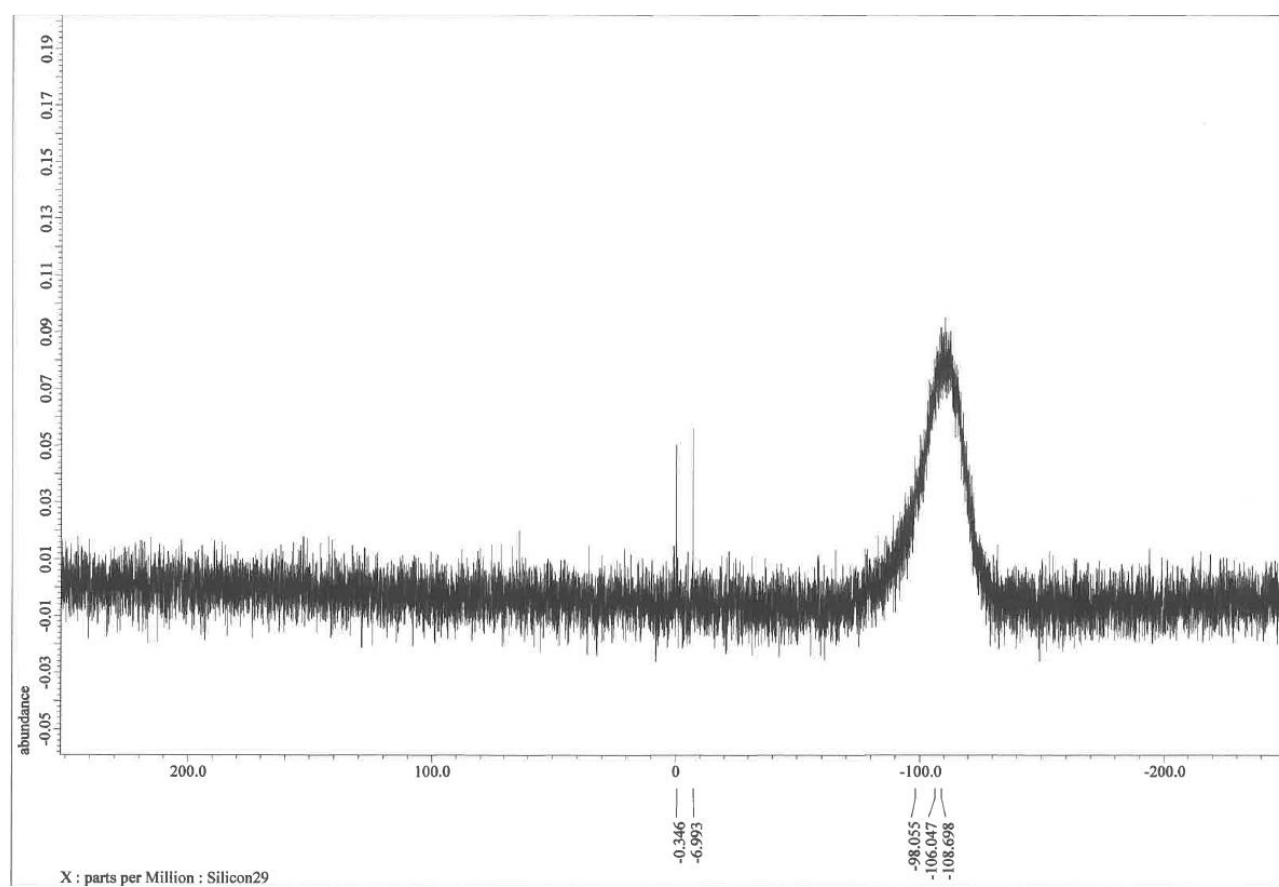

Figure S24. <sup>29</sup>Si NMR spectrum of **2b** in CDCl<sub>3</sub>.

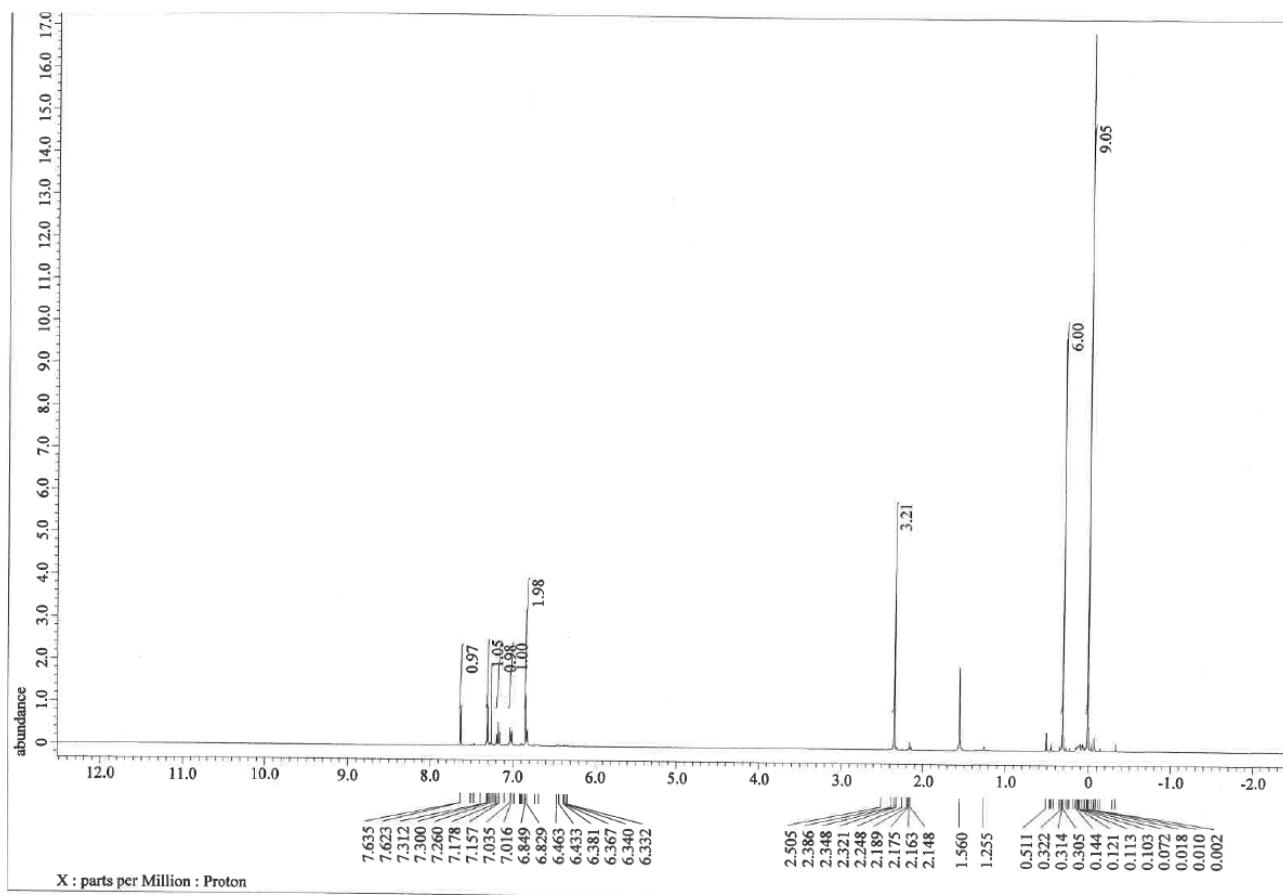

Figure S25.  $^1\text{H}$  NMR spectrum of **2c** in  $\text{CDCl}_3$ .

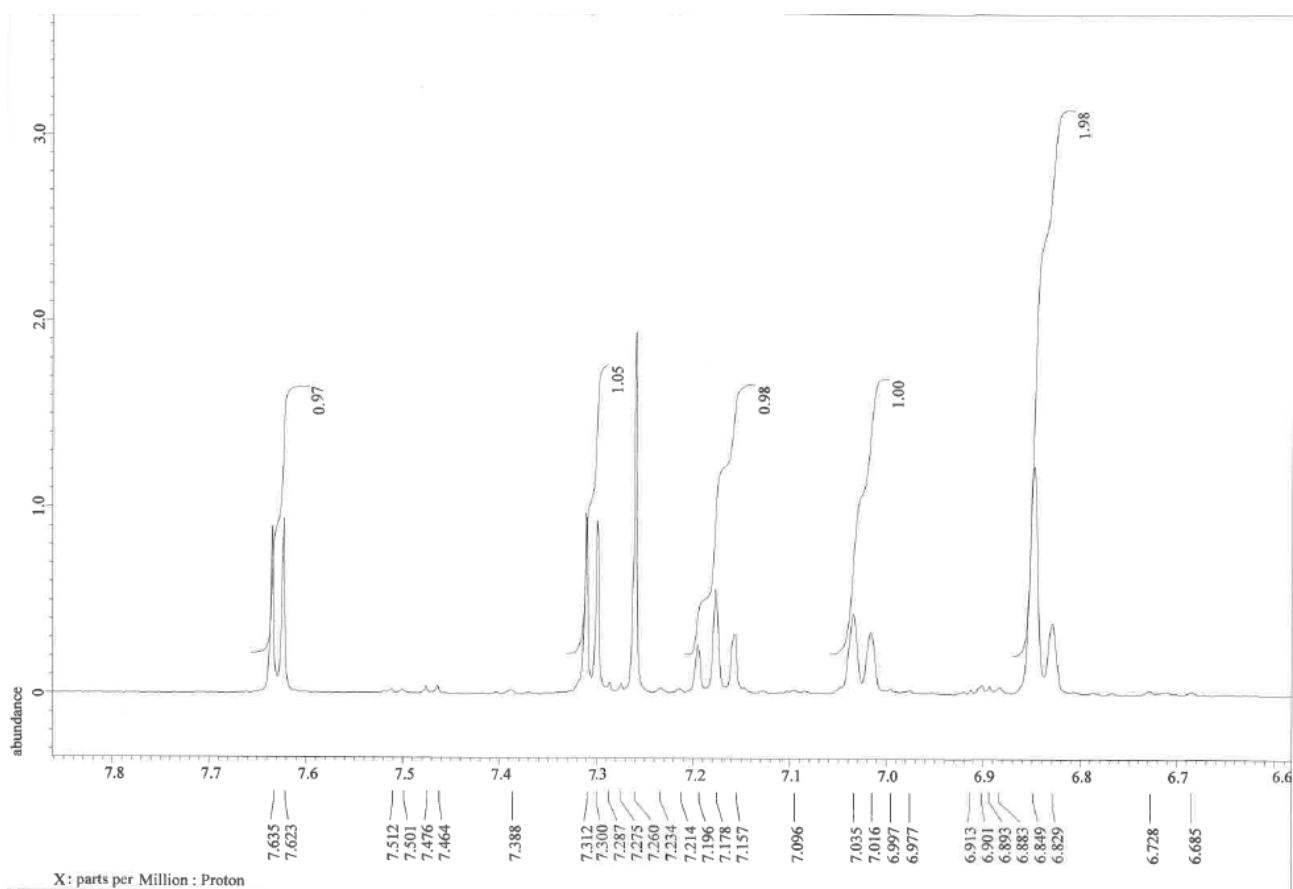

Figure S26. Enlarged view of the aromatic region for **2c**.

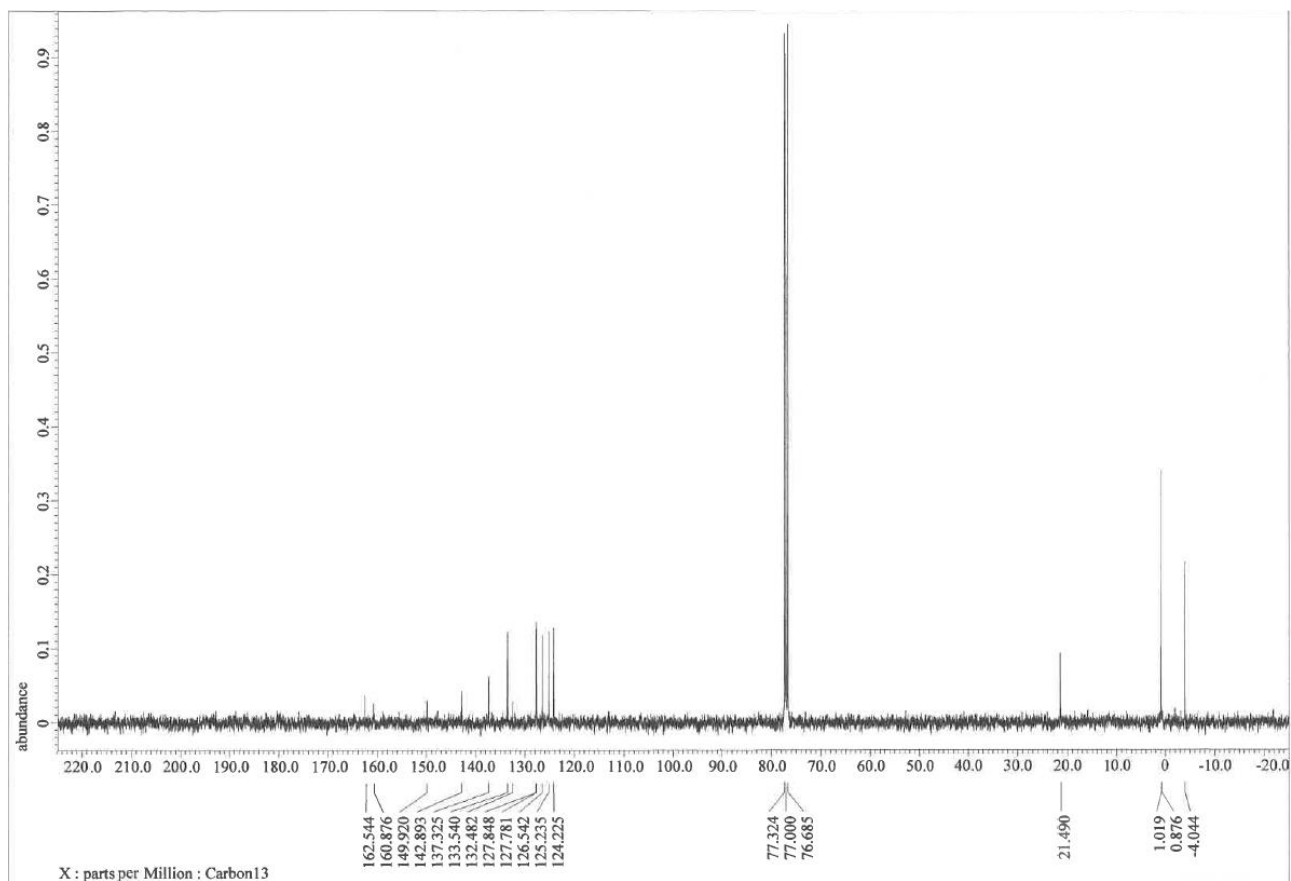

**Figure S27.** <sup>13</sup>C NMR spectrum of **2c** in CDCl<sub>3</sub>.

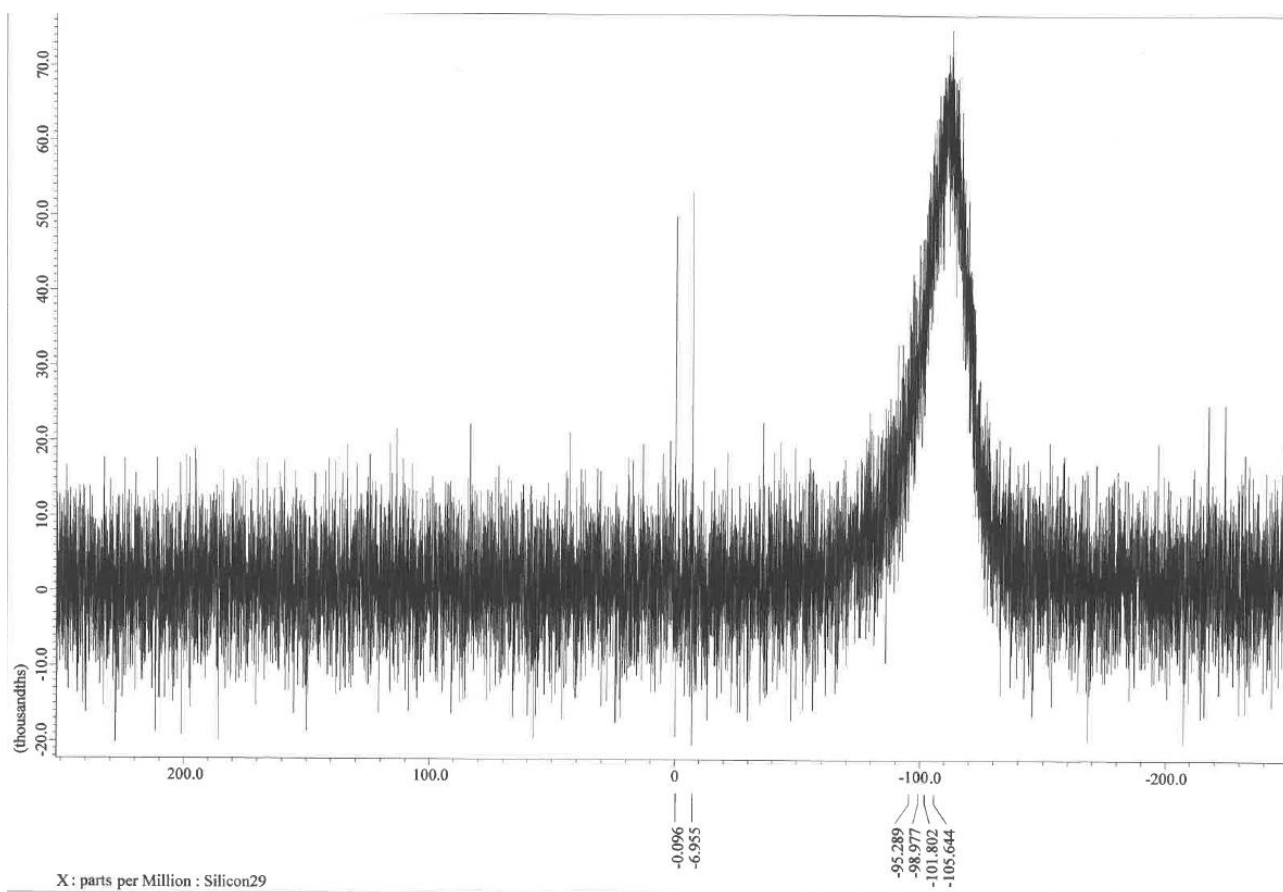

**Figure S28.** <sup>29</sup>Si NMR spectrum of **2c** in CDCl<sub>3</sub>.

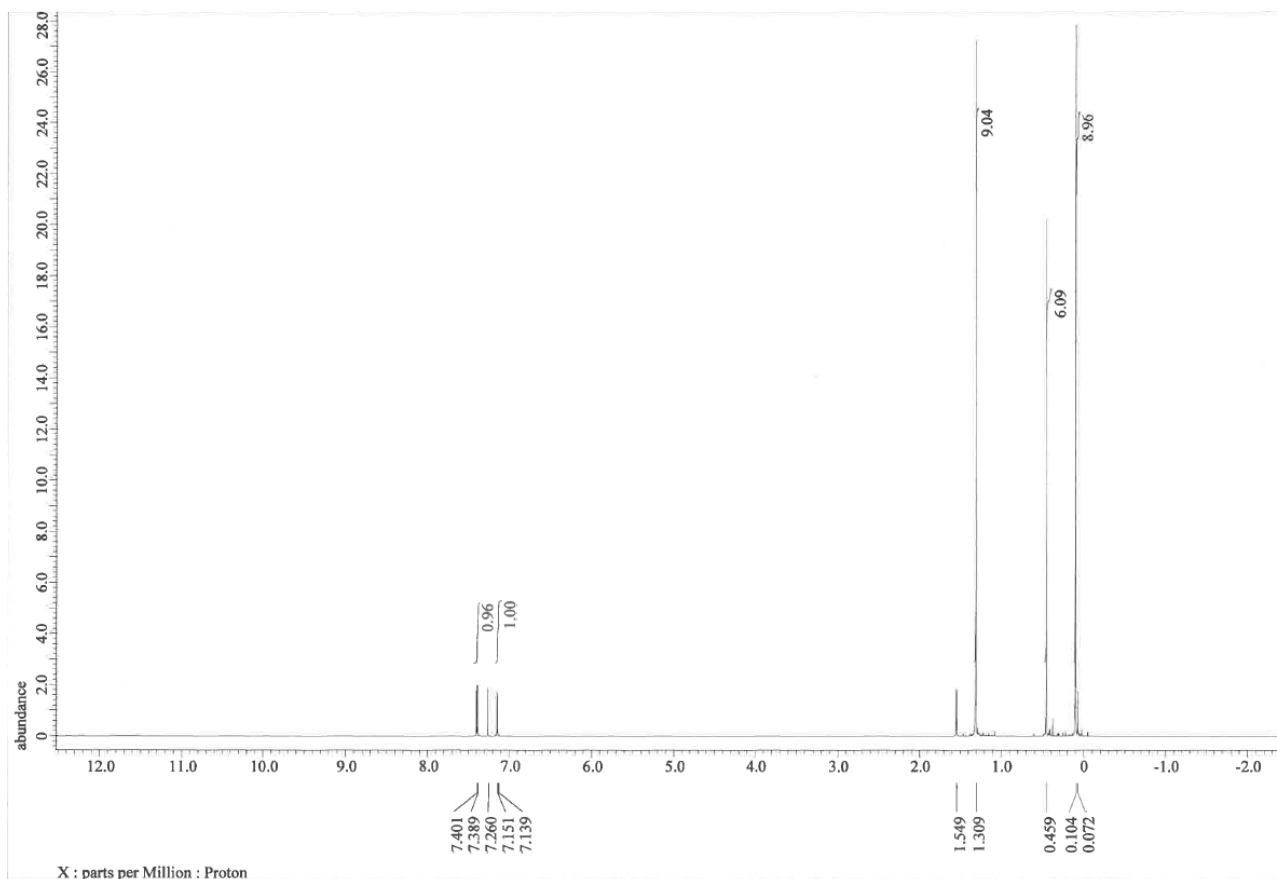

Figure S29.  $^1\text{H}$  NMR spectrum of **3** in  $\text{CDCl}_3$ .

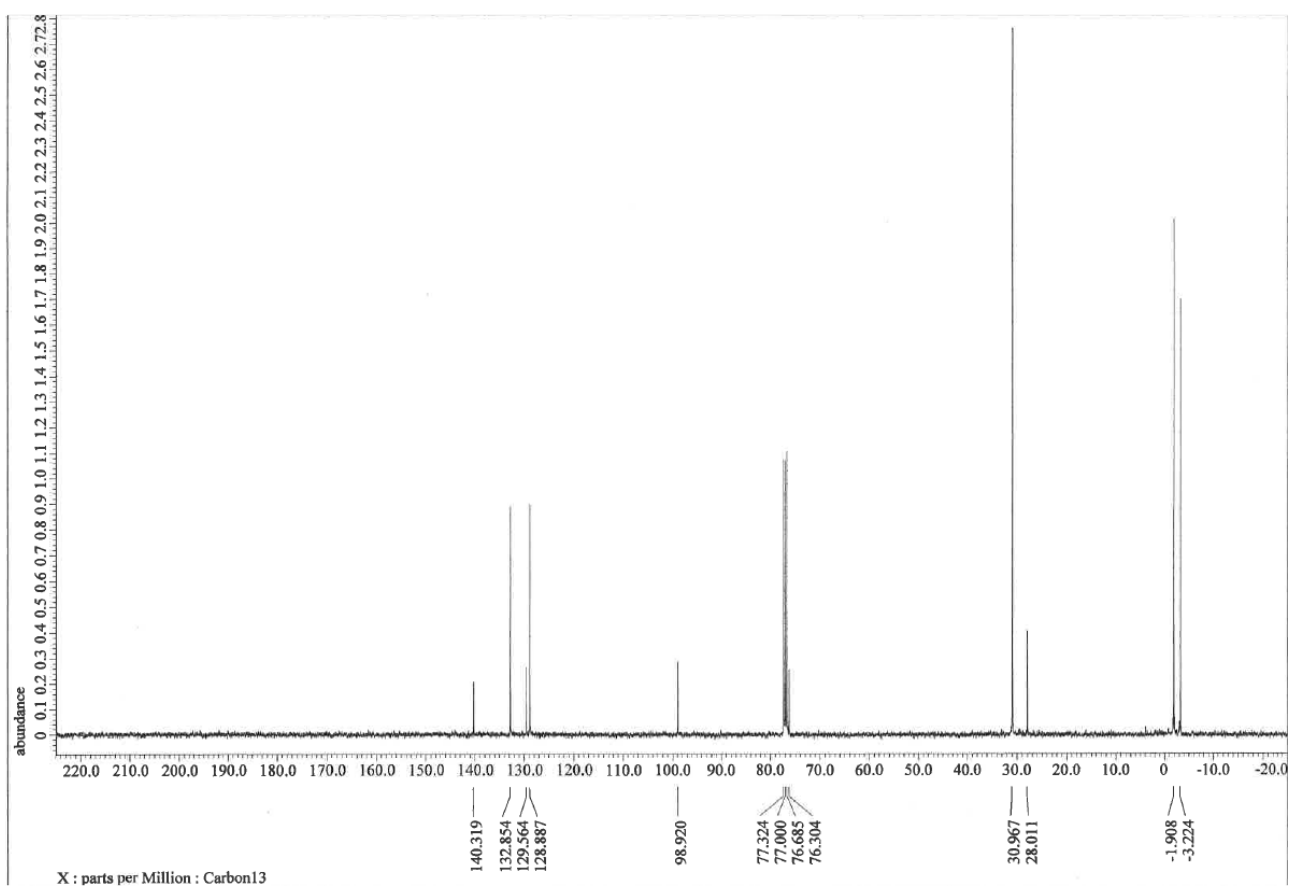

Figure S30.  $^{13}\text{C}$  NMR spectrum of **3** in  $\text{CDCl}_3$ .



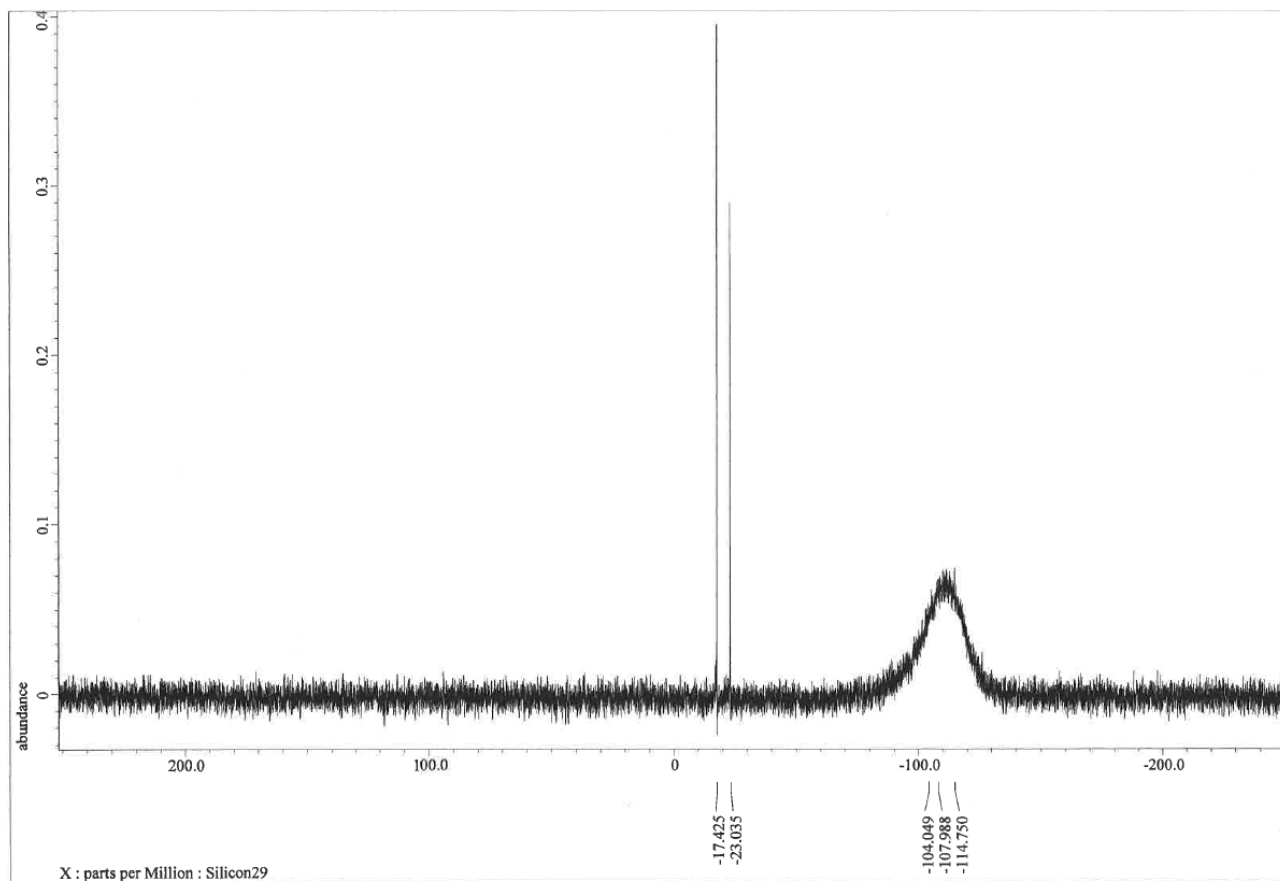

Figure S31.  $^{29}\text{Si}$  NMR spectrum of **3** in  $\text{CDCl}_3$ .

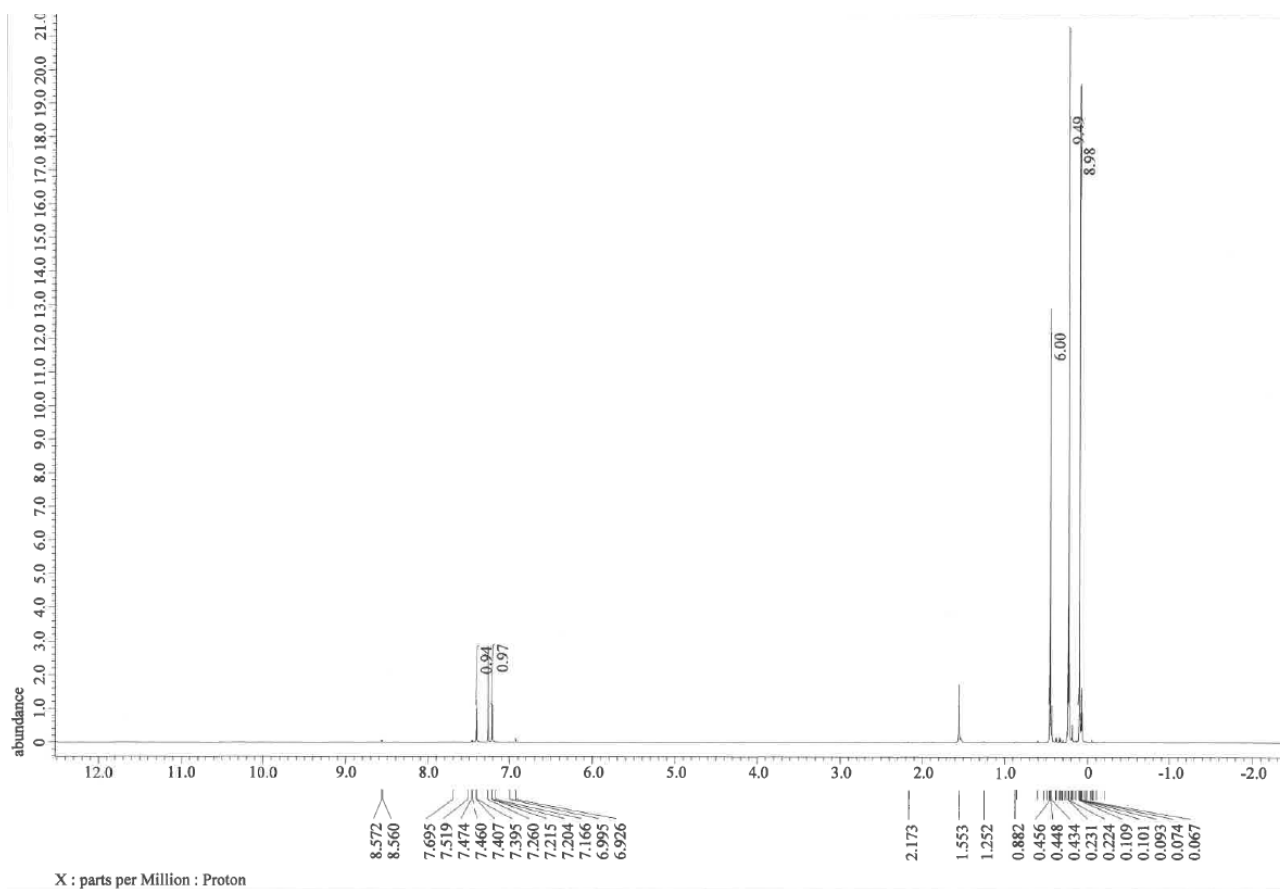

Figure S32.  $^1\text{H}$  NMR spectrum of **4** in  $\text{CDCl}_3$ .

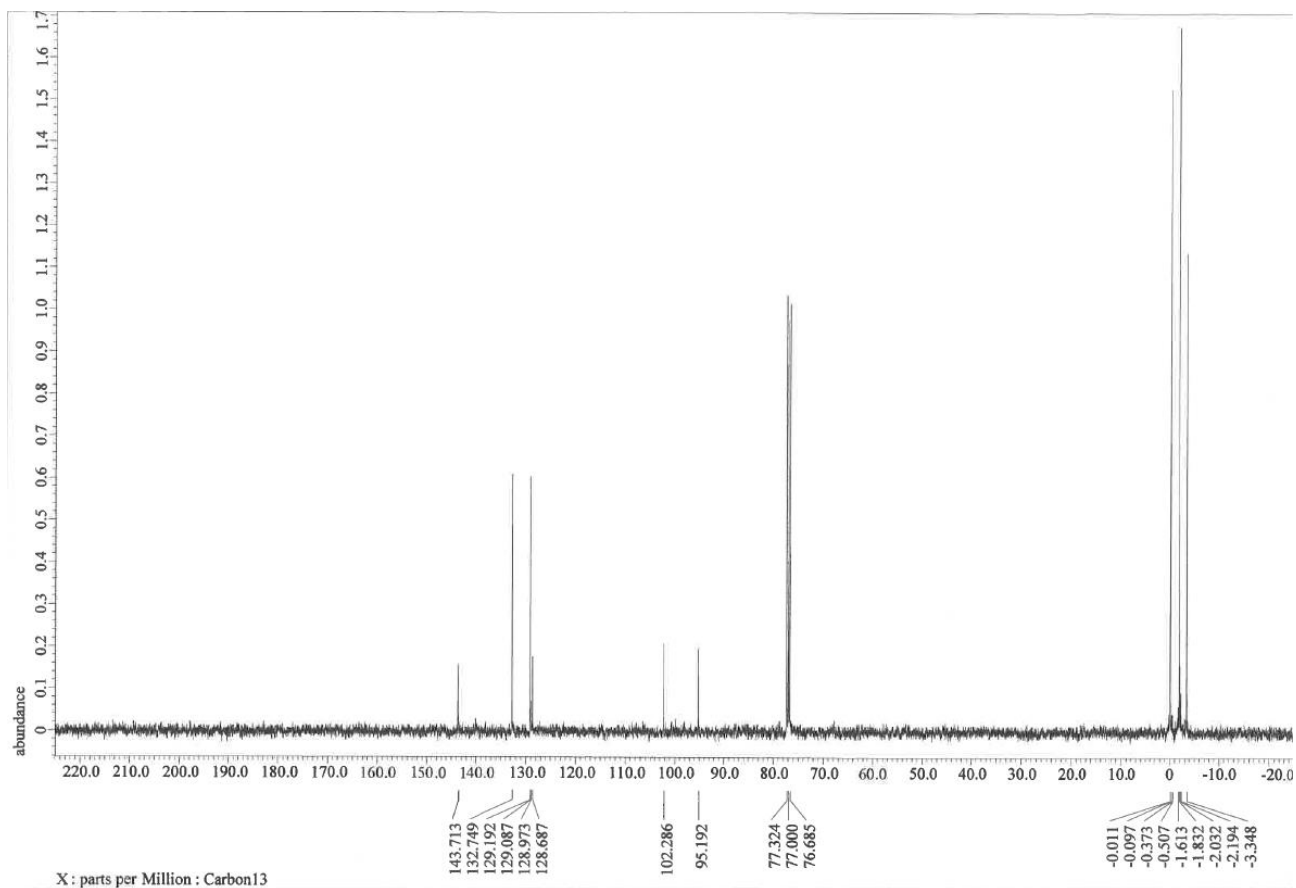

**Figure S33.** <sup>13</sup>C NMR spectrum of **4** in CDCl<sub>3</sub>.

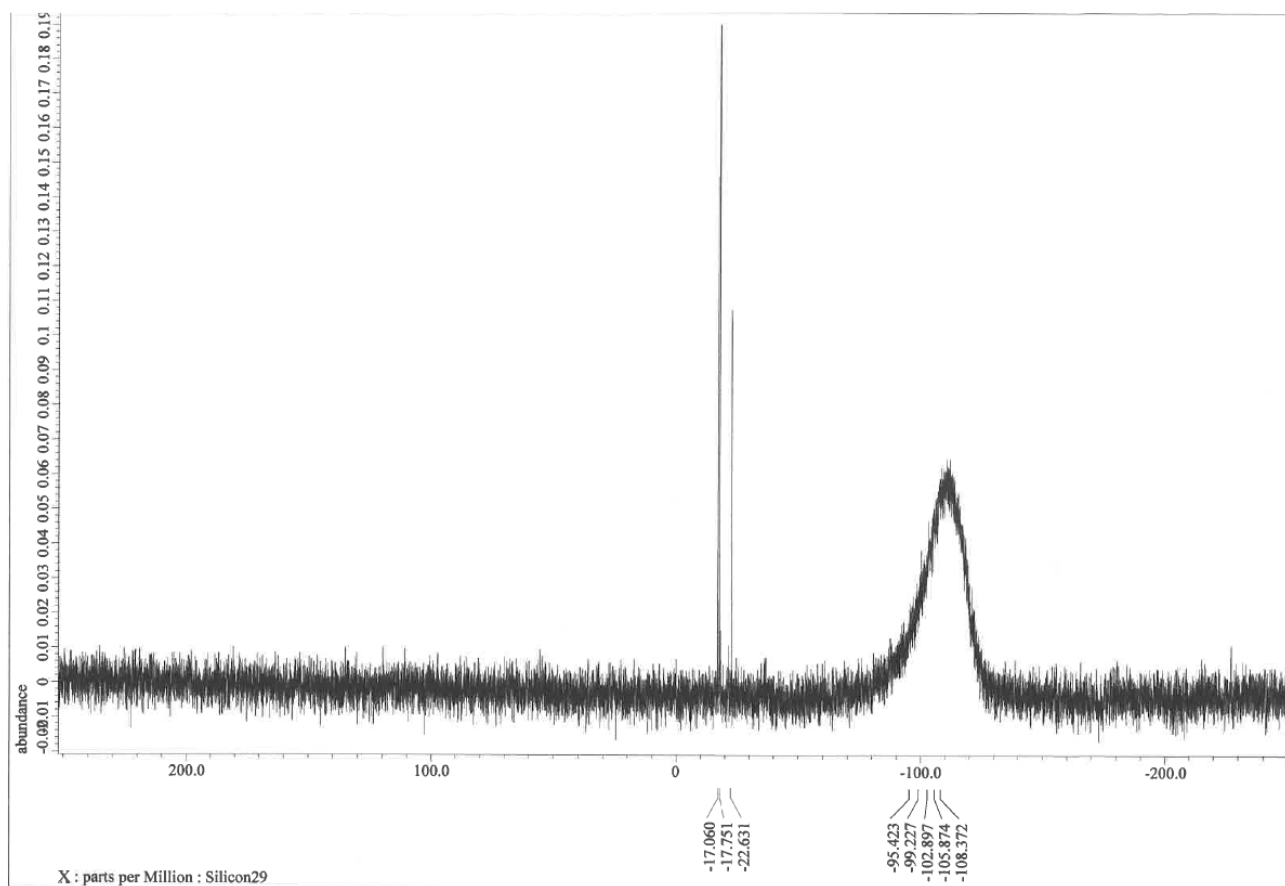

**Figure S34.** <sup>29</sup>Si NMR spectrum of **4** in CDCl<sub>3</sub>.

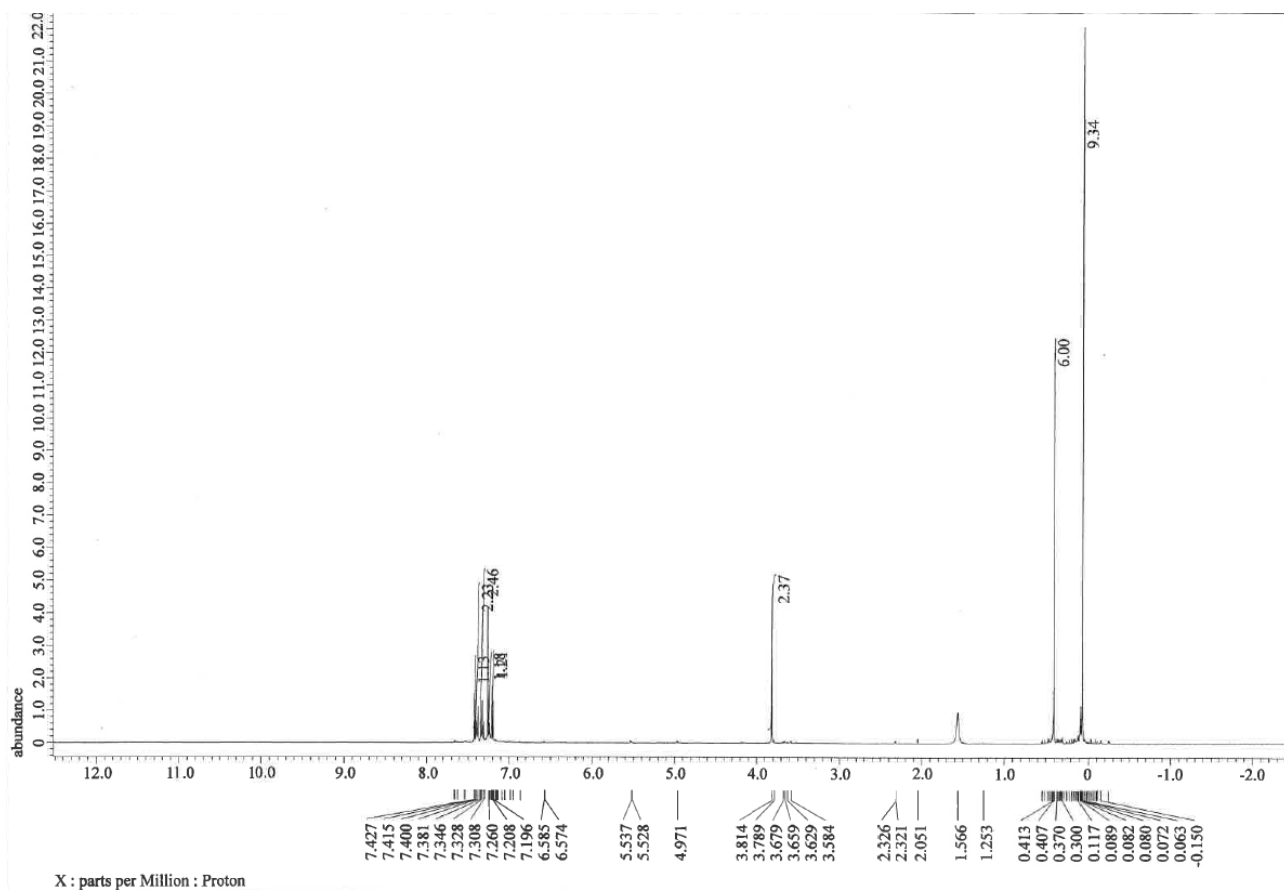

Figure S35.  $^1\text{H}$  NMR spectrum of **5** in  $\text{CDCl}_3$ .

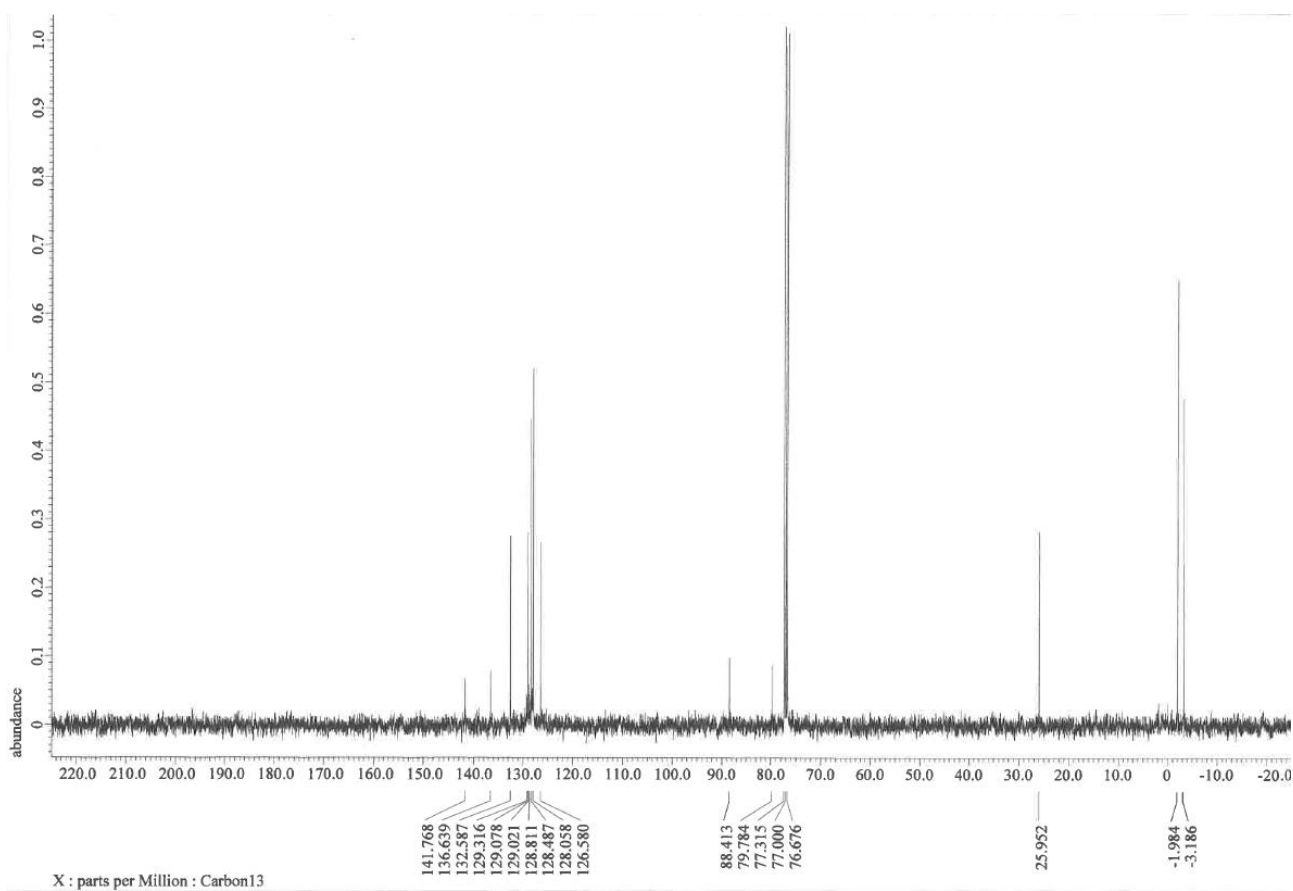

Figure S36.  $^{13}\text{C}$  NMR spectrum of **5** in  $\text{CDCl}_3$ .

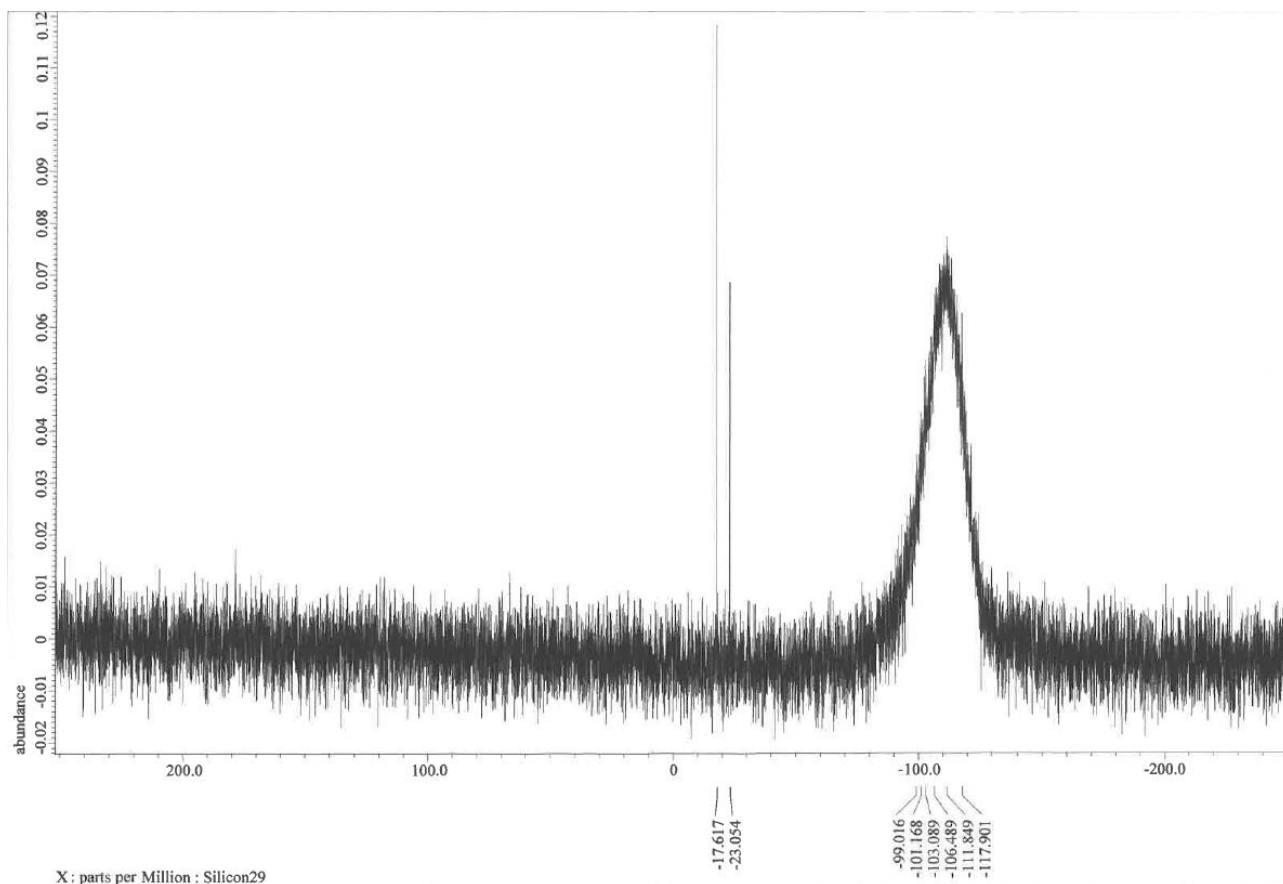

**Figure S37.**  $^{29}\text{Si}$  NMR spectrum of **5** in  $\text{CDCl}_3$ .

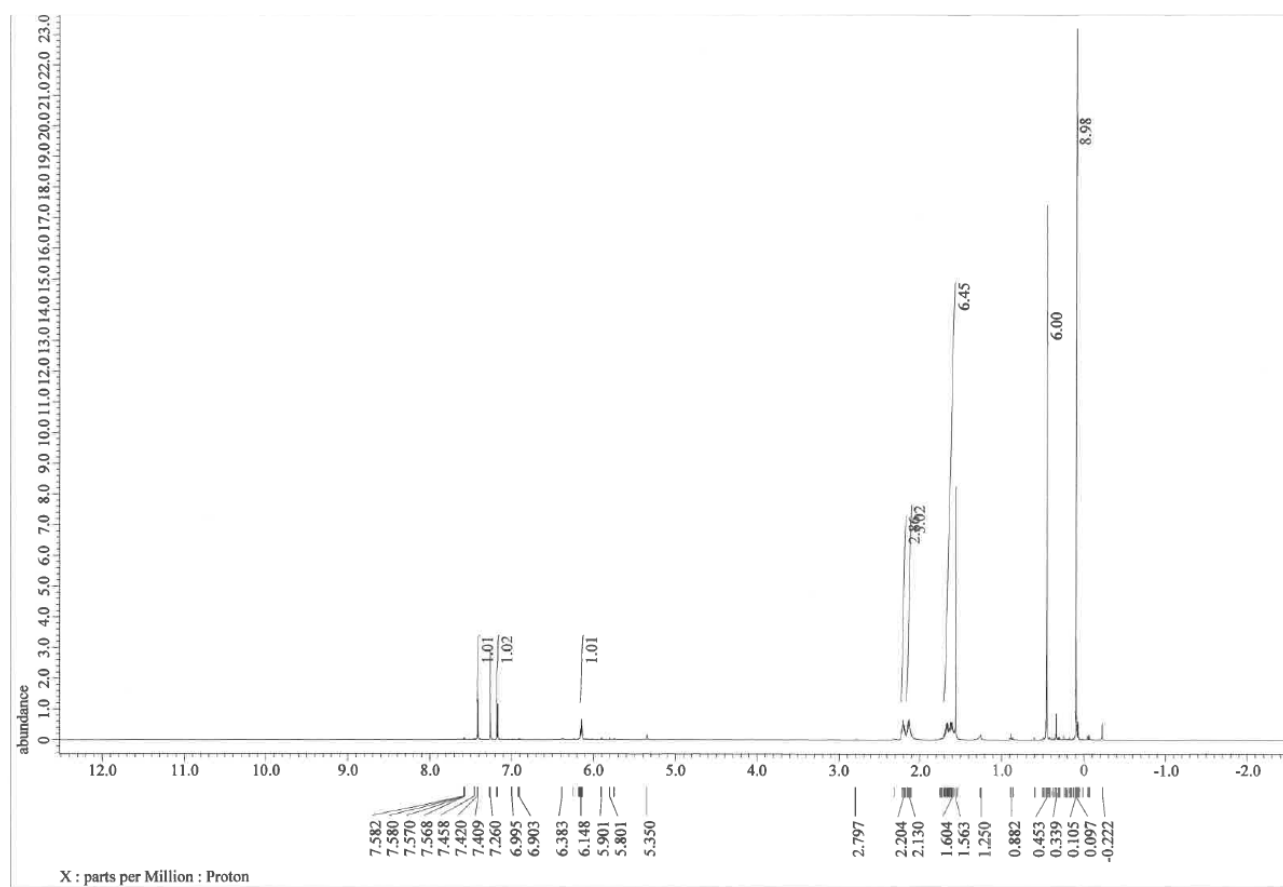

**Figure S38.**  $^1\text{H}$  NMR spectrum of **6** in  $\text{CDCl}_3$ .

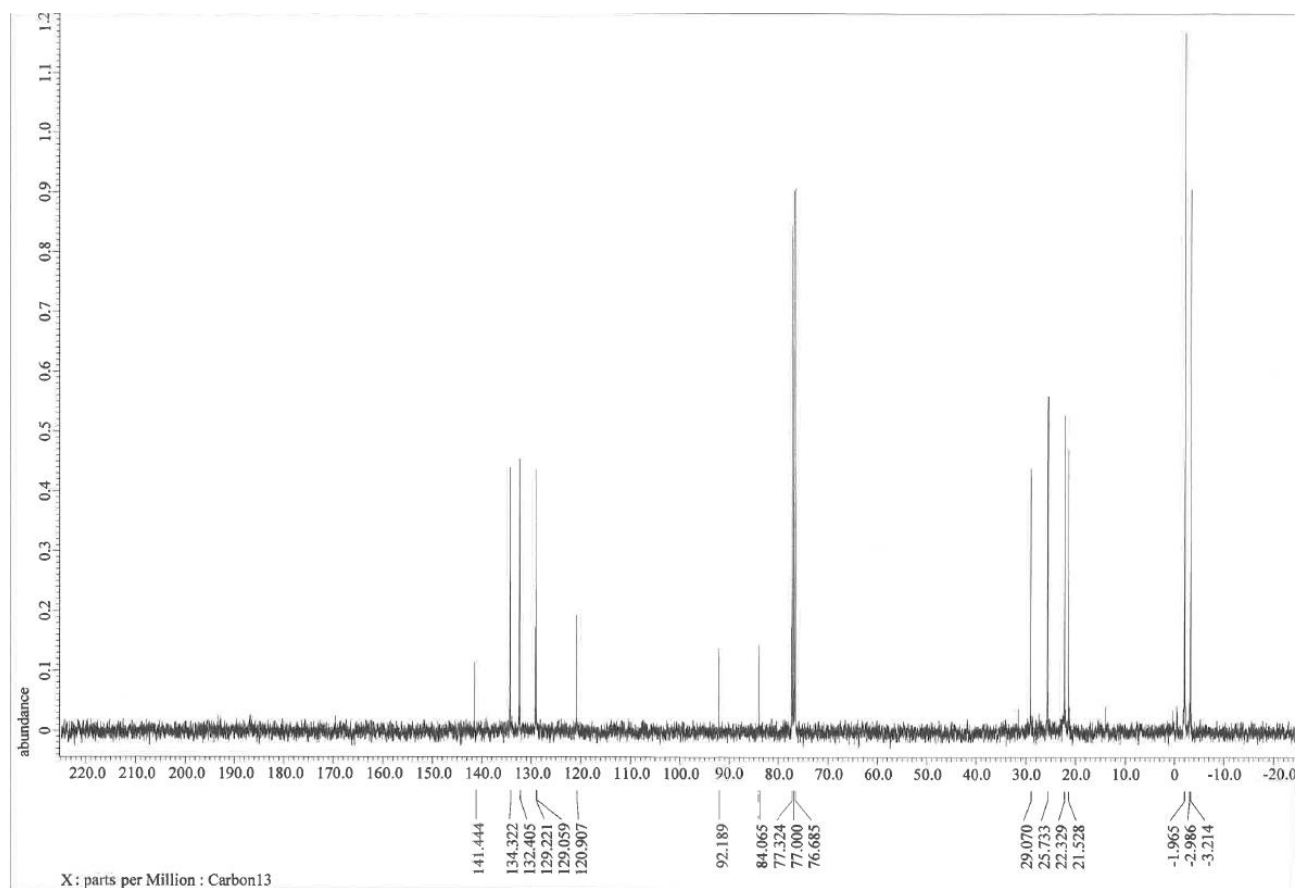

**Figure S39.**  $^{13}\text{C}$  NMR spectrum of **6** in  $\text{CDCl}_3$ .

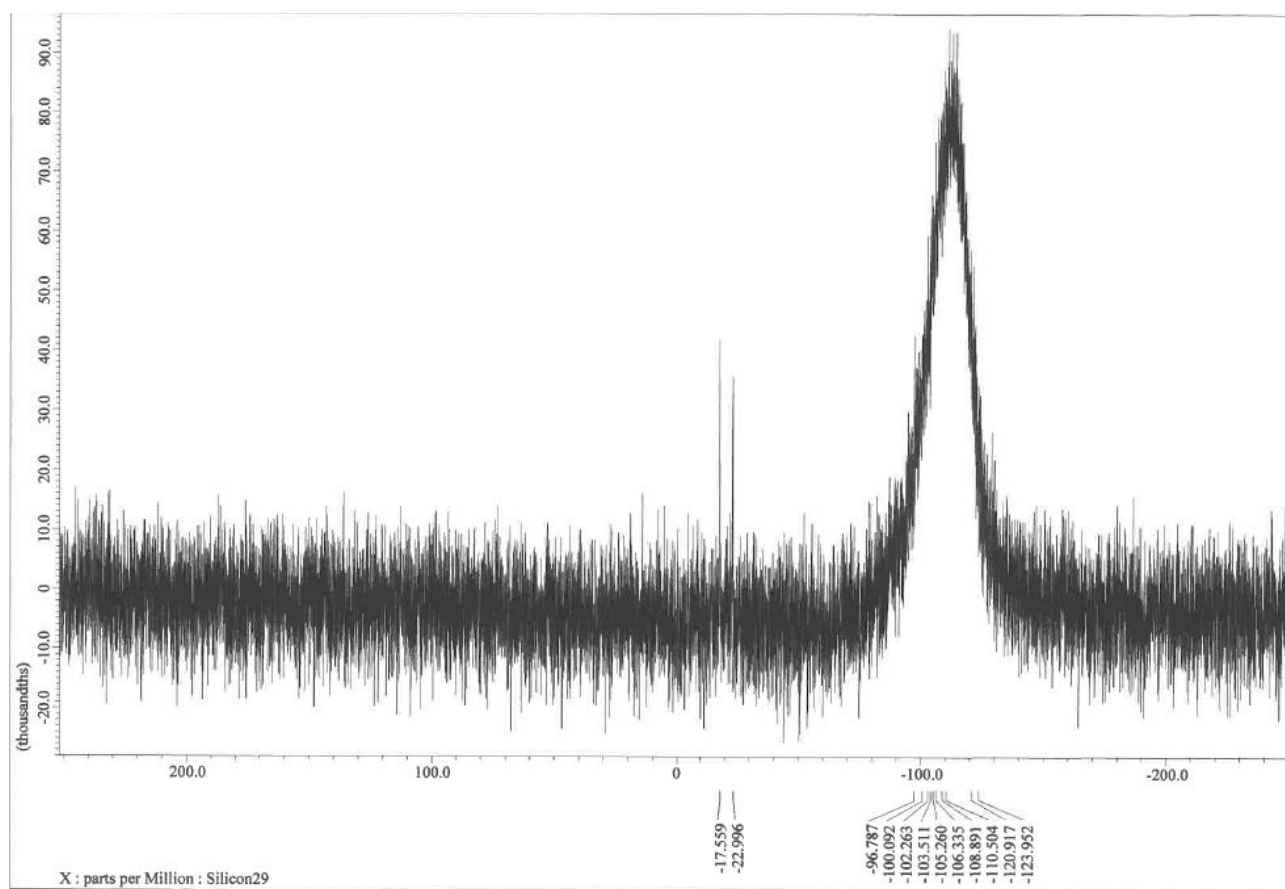

**Figure S40.**  $^{29}\text{Si}$  NMR spectrum of **6** in  $\text{CDCl}_3$ .

Catalyst: Rh(nbd)Cl

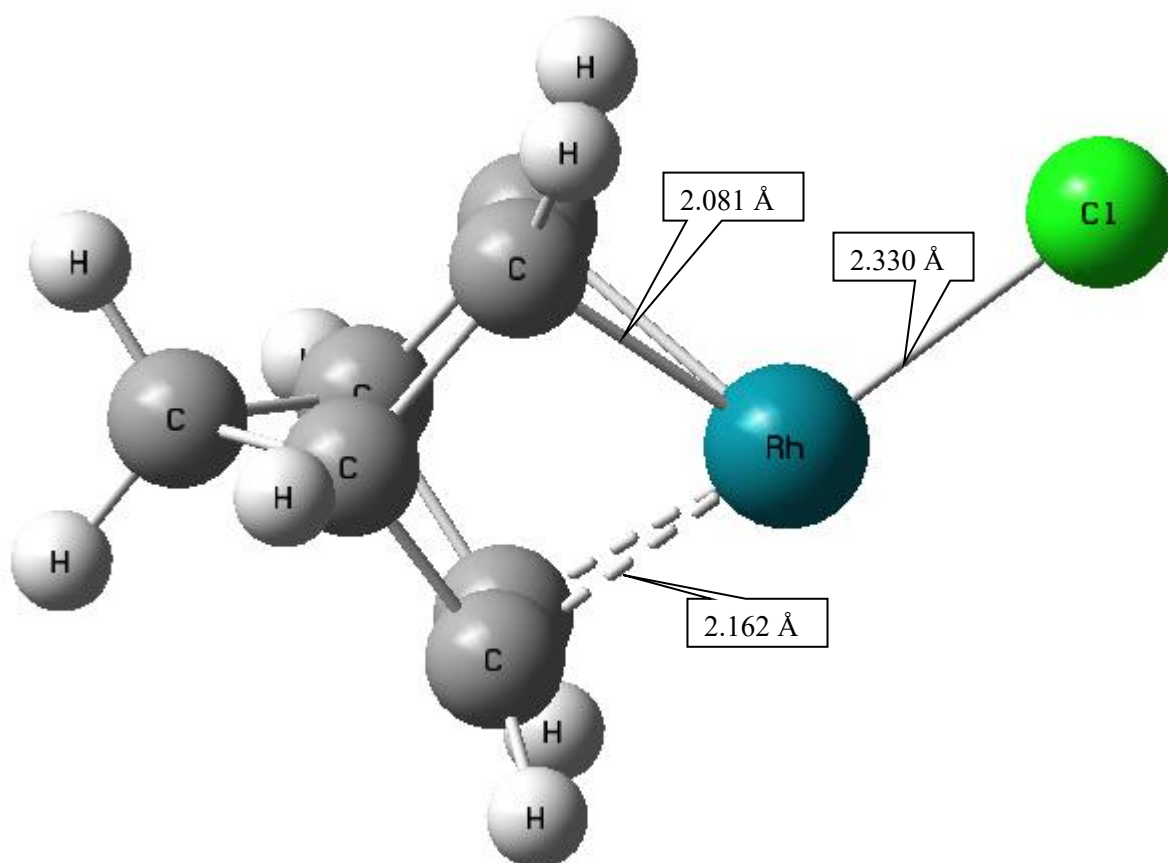

$E(\text{SCF}) = -841.2814 \text{ au}$ ,  $E(\text{Free}) = -841.1966 \text{ au}$ .

**Figure S41.** Optimized structures for RhCl(nbd) with 6-31+G(d,p) and LanL2DZ(f) basis.

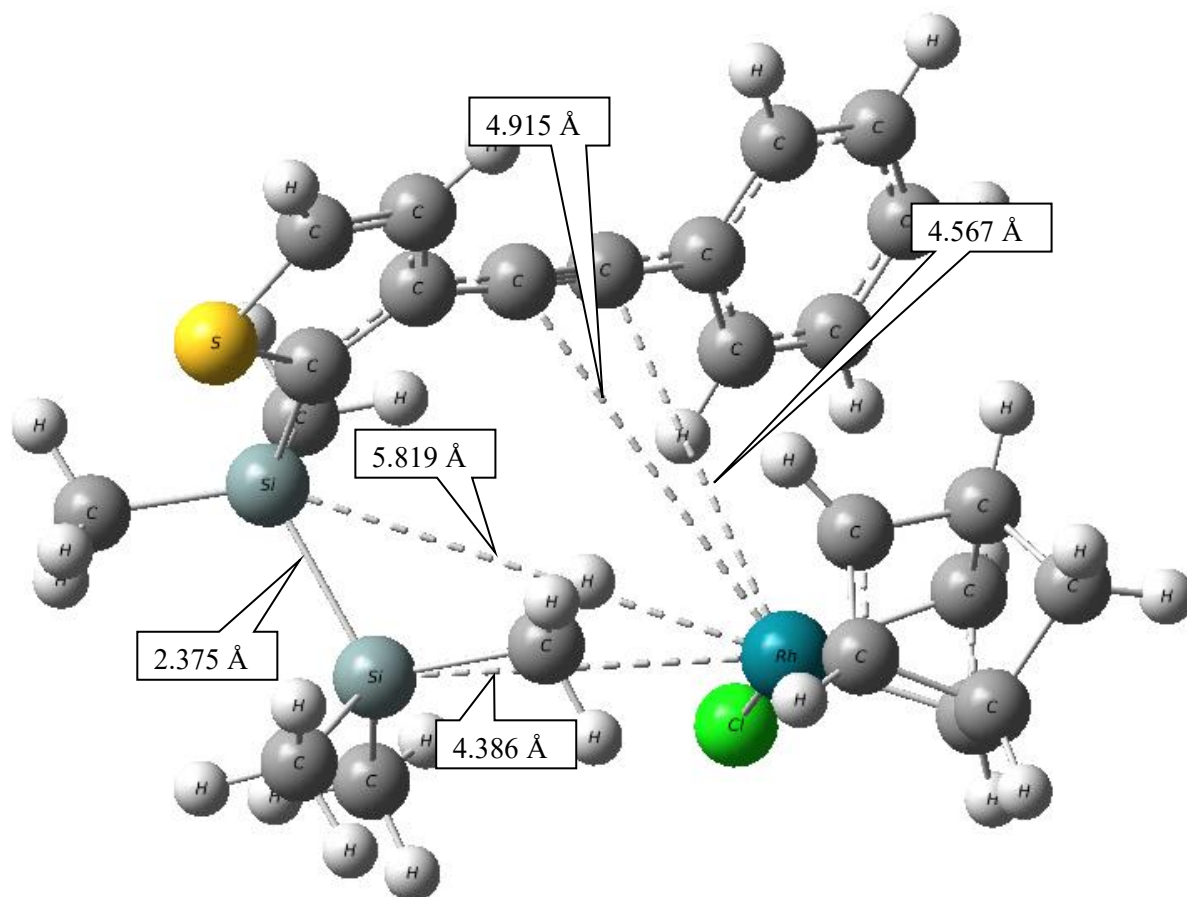

**1**+RhCl(nbd)

E(SCF) = -2479.5789 au, E(Free) = -2479.2160 au.

**Figure S42.** Optimized structure for **1** + RhCl(nbd) with 6-31+G(d,p) and LanL2DZ(f) basis.

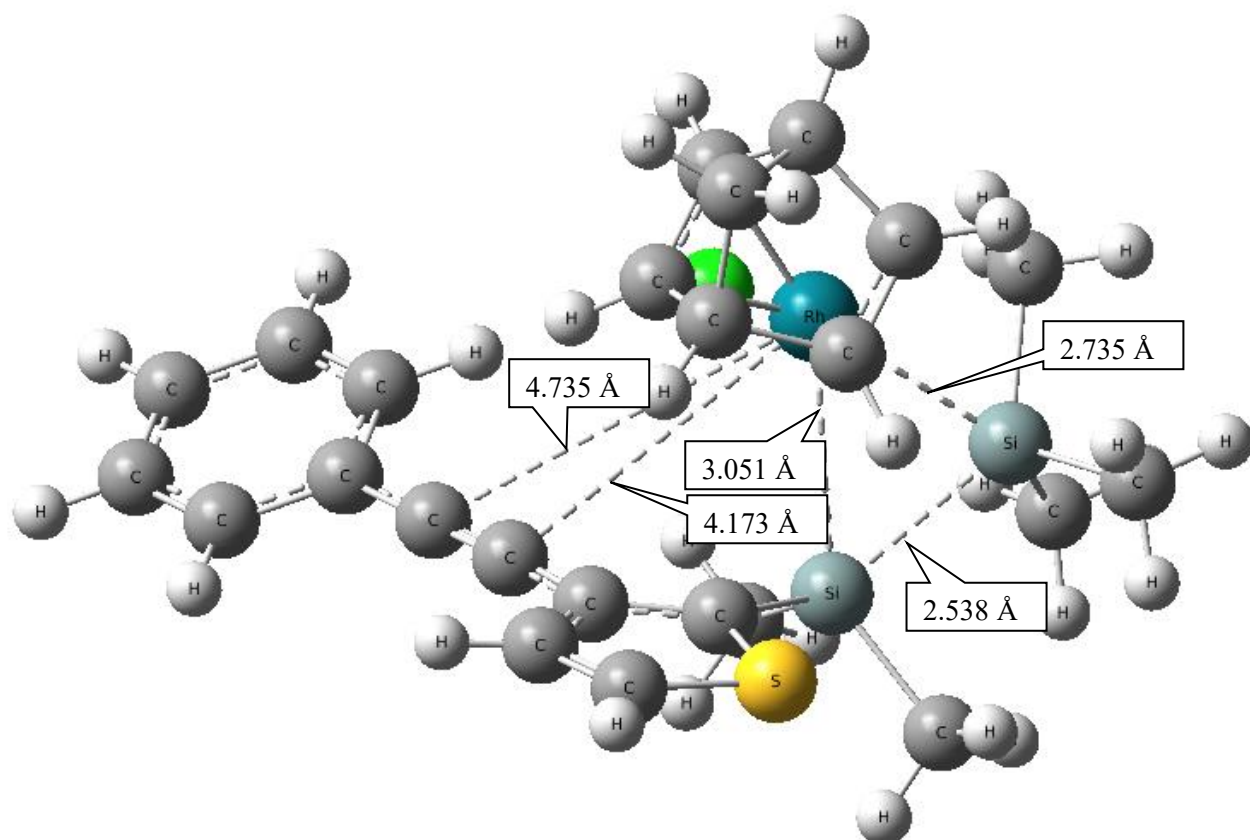

**TS-0**

$E(\text{SCF}) = -2479.5518 \text{ au}$ ,  $E(\text{Free}) = -2479.1790 \text{ au}$ .

**Figure S43.** Optimized structure for **TS-0** with 6-31+G(d,p) and LanL2DZ(f) basis.



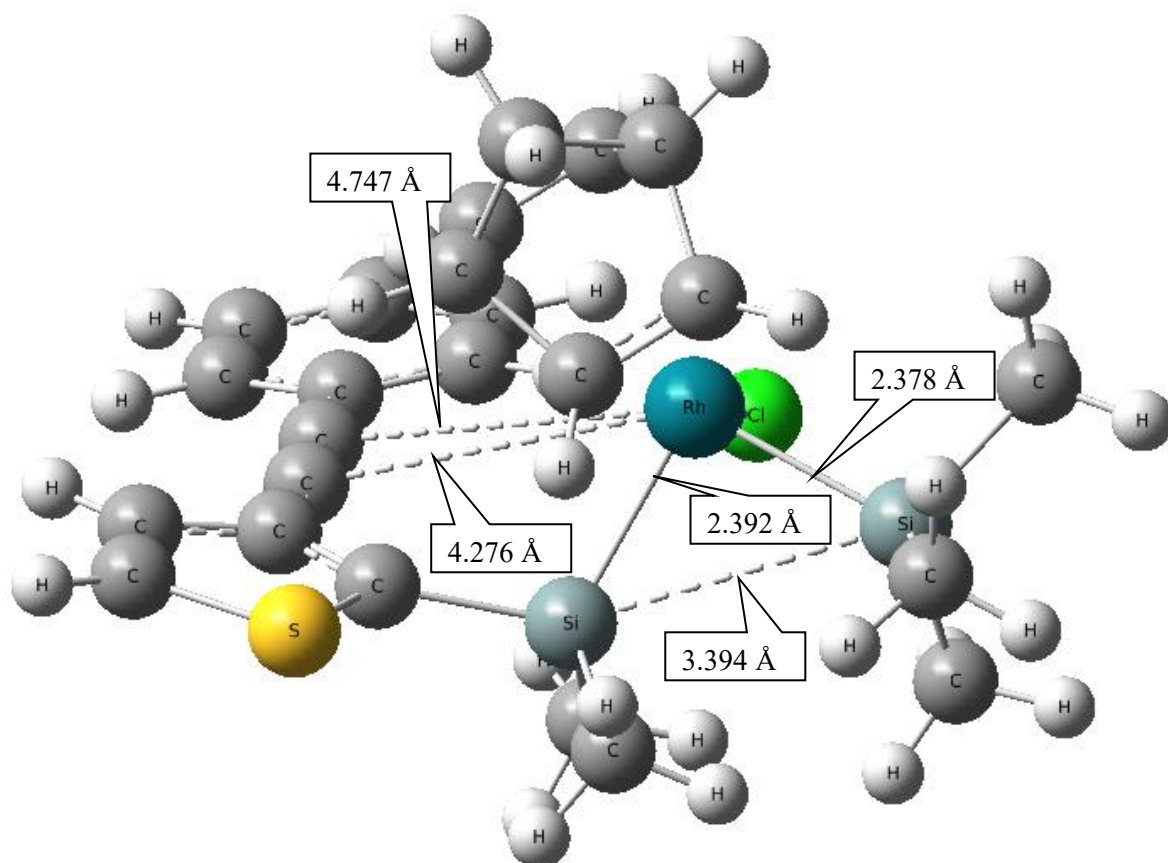

**IM-1**

$E(\text{SCF}) = -2479.5861 \text{ au}$ ,  $E(\text{Free}) = -2479.2143 \text{ au}$ .

**Figure S44.** Optimized structure for **IM-1** with 6-31+G(d,p) and LanL2DZ(f) basis.

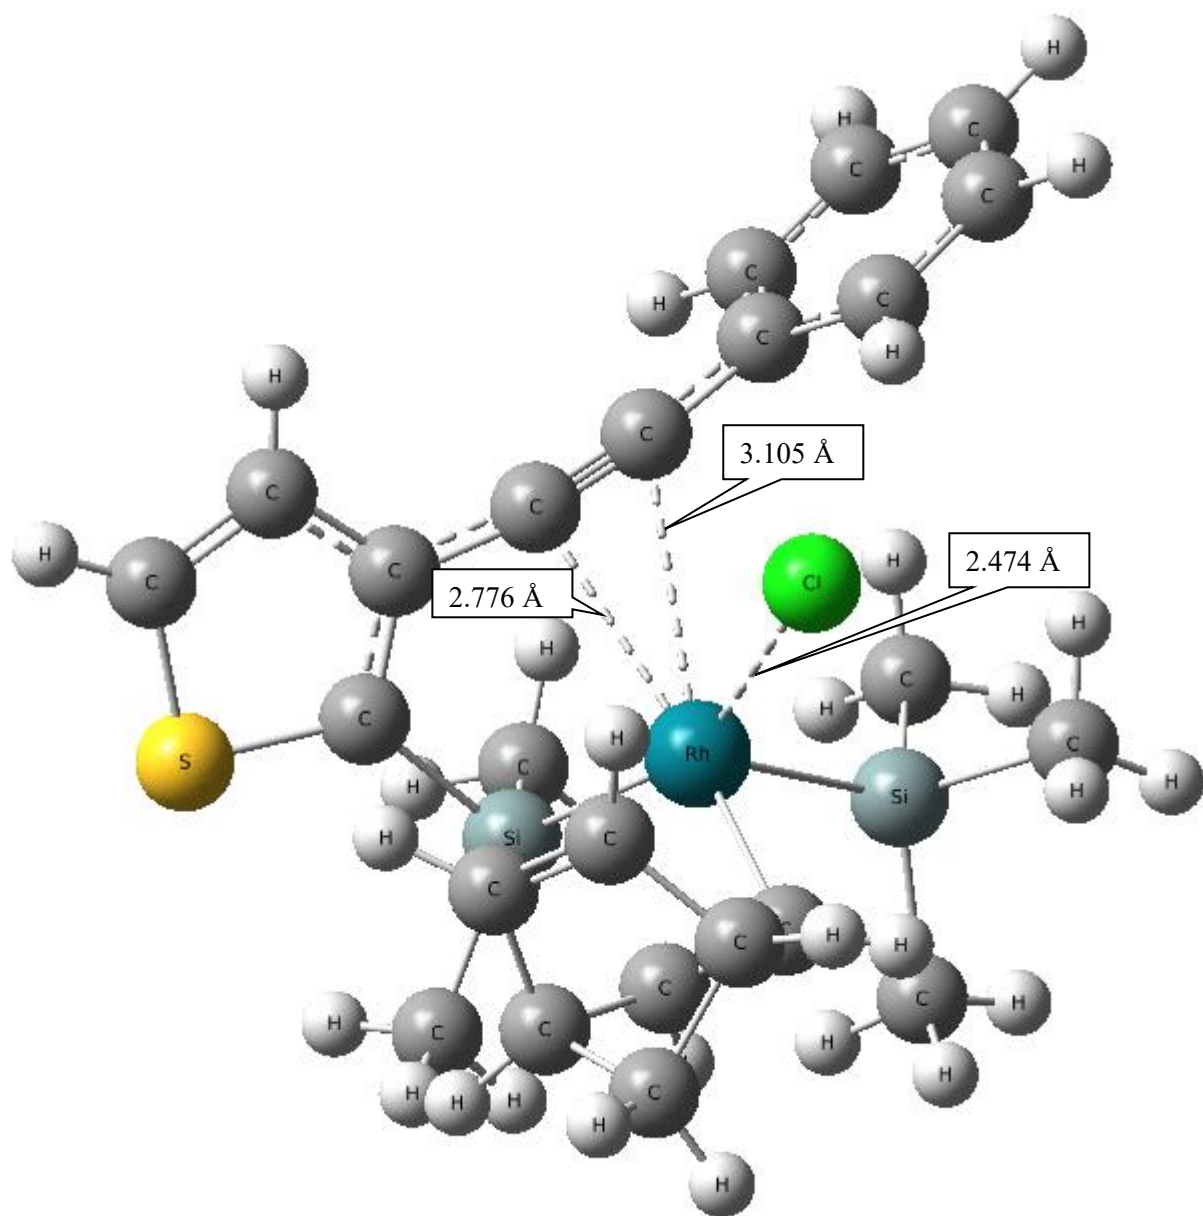

### TS-1

$E(\text{SCF}) = -2479.5525 \text{ au}$ ,  $E(\text{Free}) = -2479.1809 \text{ au}$ .

**Figure S45.** Optimized structure for **TS-1** with 6-31+G(d,p) and LanL2DZ(f) basis.

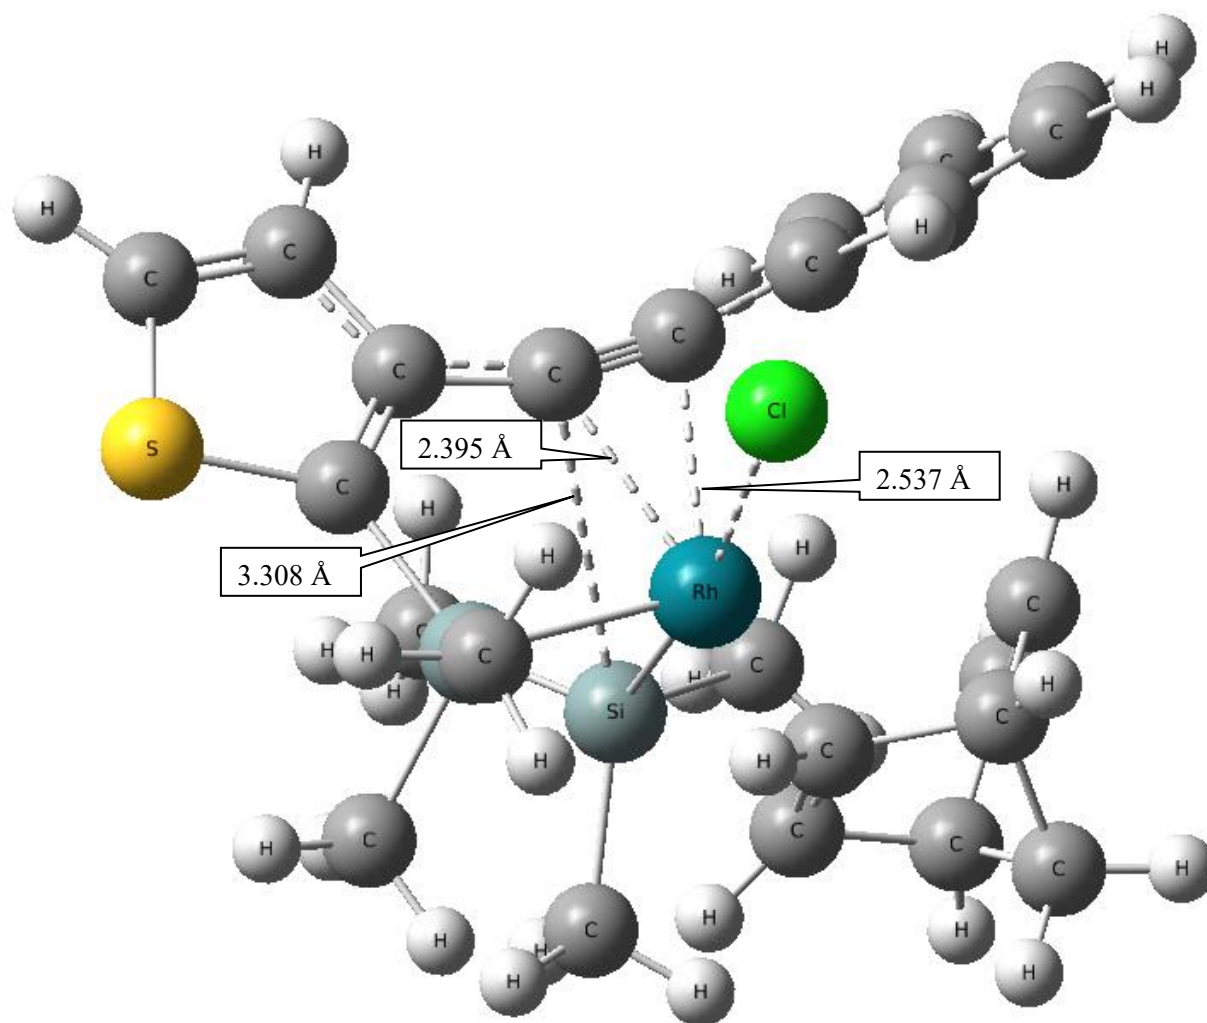

**IM-2**

$E(\text{SCF}) = -2479.5642 \text{ au}$ ,  $E(\text{Free}) = -2479.1888 \text{ au}$ .

**Figure S46.** Optimized structure for **IM-2** with 6-31+G(d,p) and LanL2DZ(f) basis.

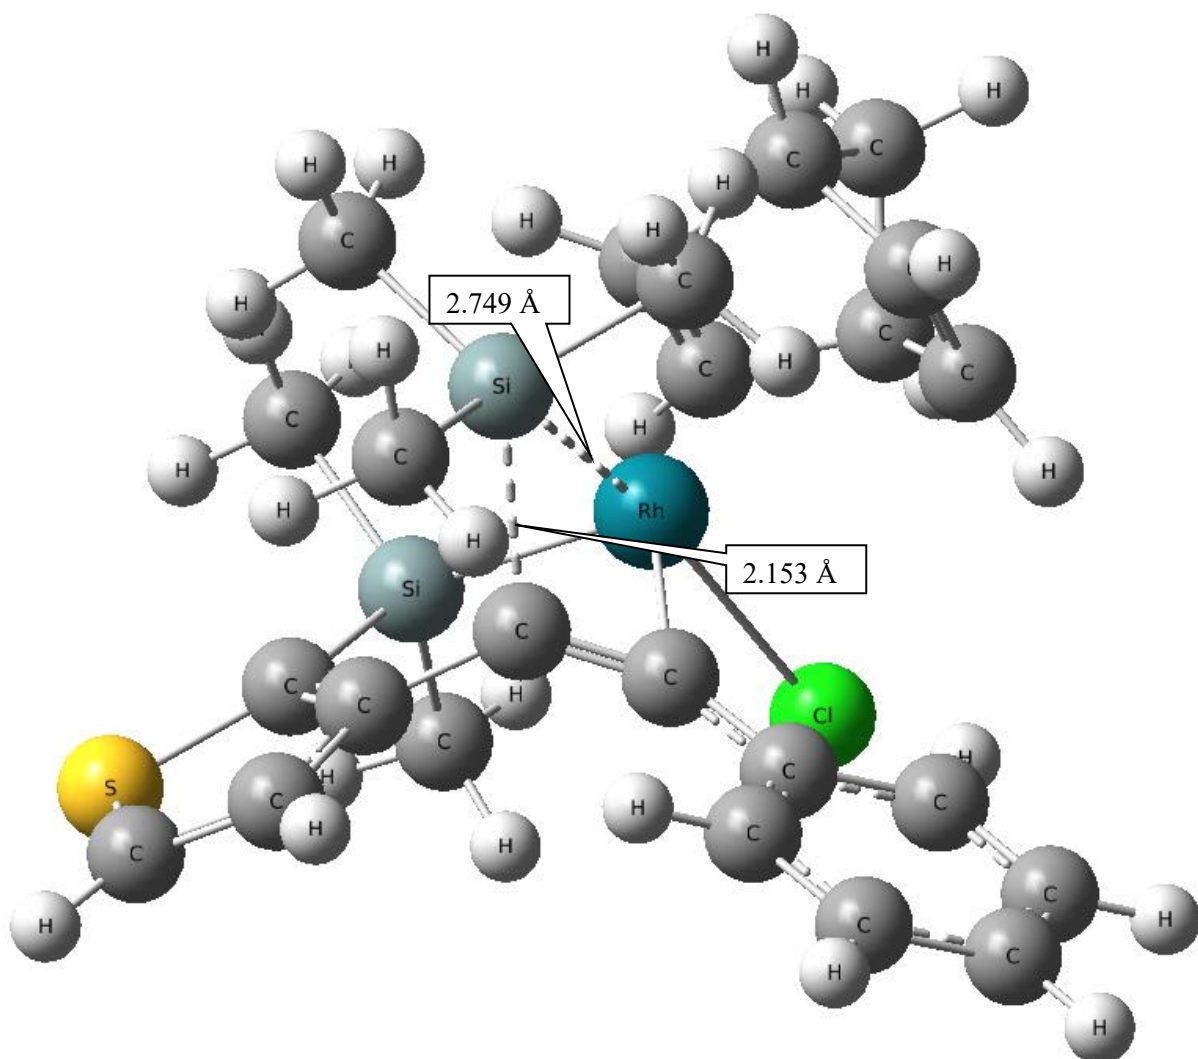

**TS-2**

$E(\text{SCF}) = -2479.5256 \text{ au}$ ,  $E(\text{Free}) = -2479.1490 \text{ au}$ .

**Figure S47.** Optimized structure for **TS-2** with 6-31+G(d,p) and LanL2DZ(f) basis.

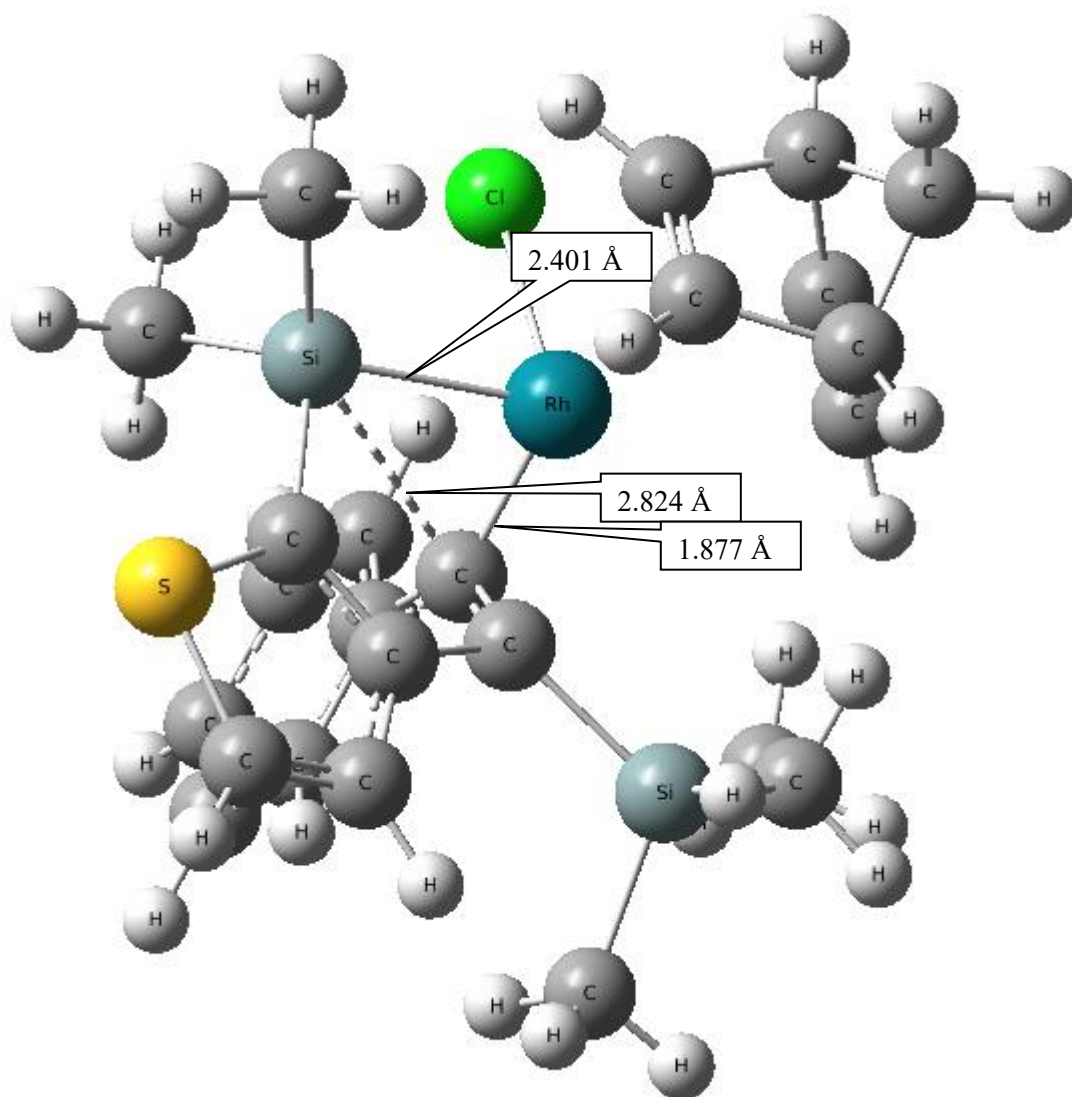

### IM-3

$E(\text{SCF}) = -2479.5752 \text{ au}$ ,  $E(\text{Free}) = -2479.2034 \text{ au}$ .

**Figure S48.** Optimized structure for **IM-3** with 6-31+G(d,p) and LanL2DZ(f) basis.

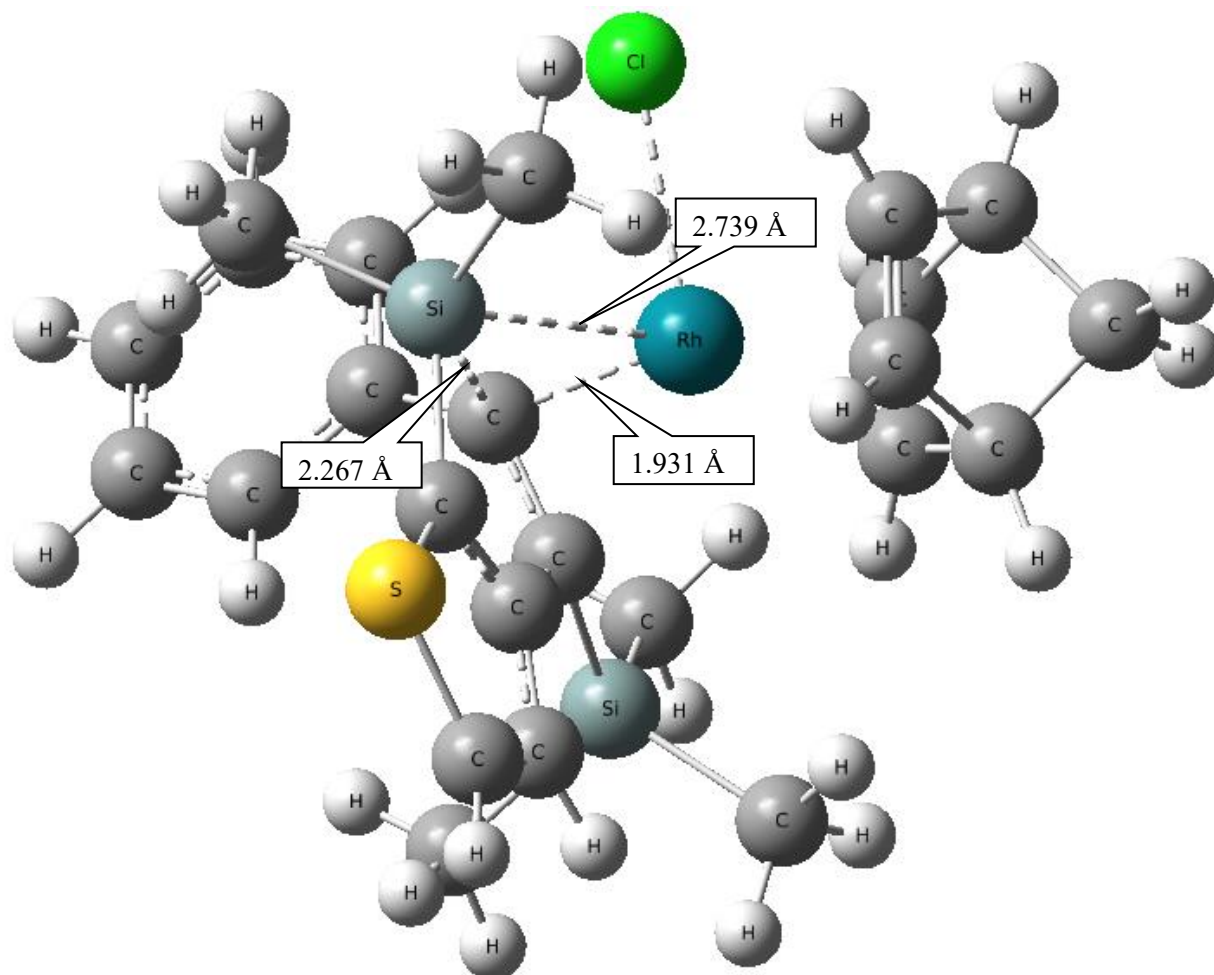

### TS-3

$E(\text{SCF}) = -2479.5610 \text{ au}$ ,  $E(\text{Free}) = -2479.1852 \text{ au}$

**Figure S49.** Optimized structure for **TS-3** with 6-31+G(d,p) and LanL2DZ(f) basis.

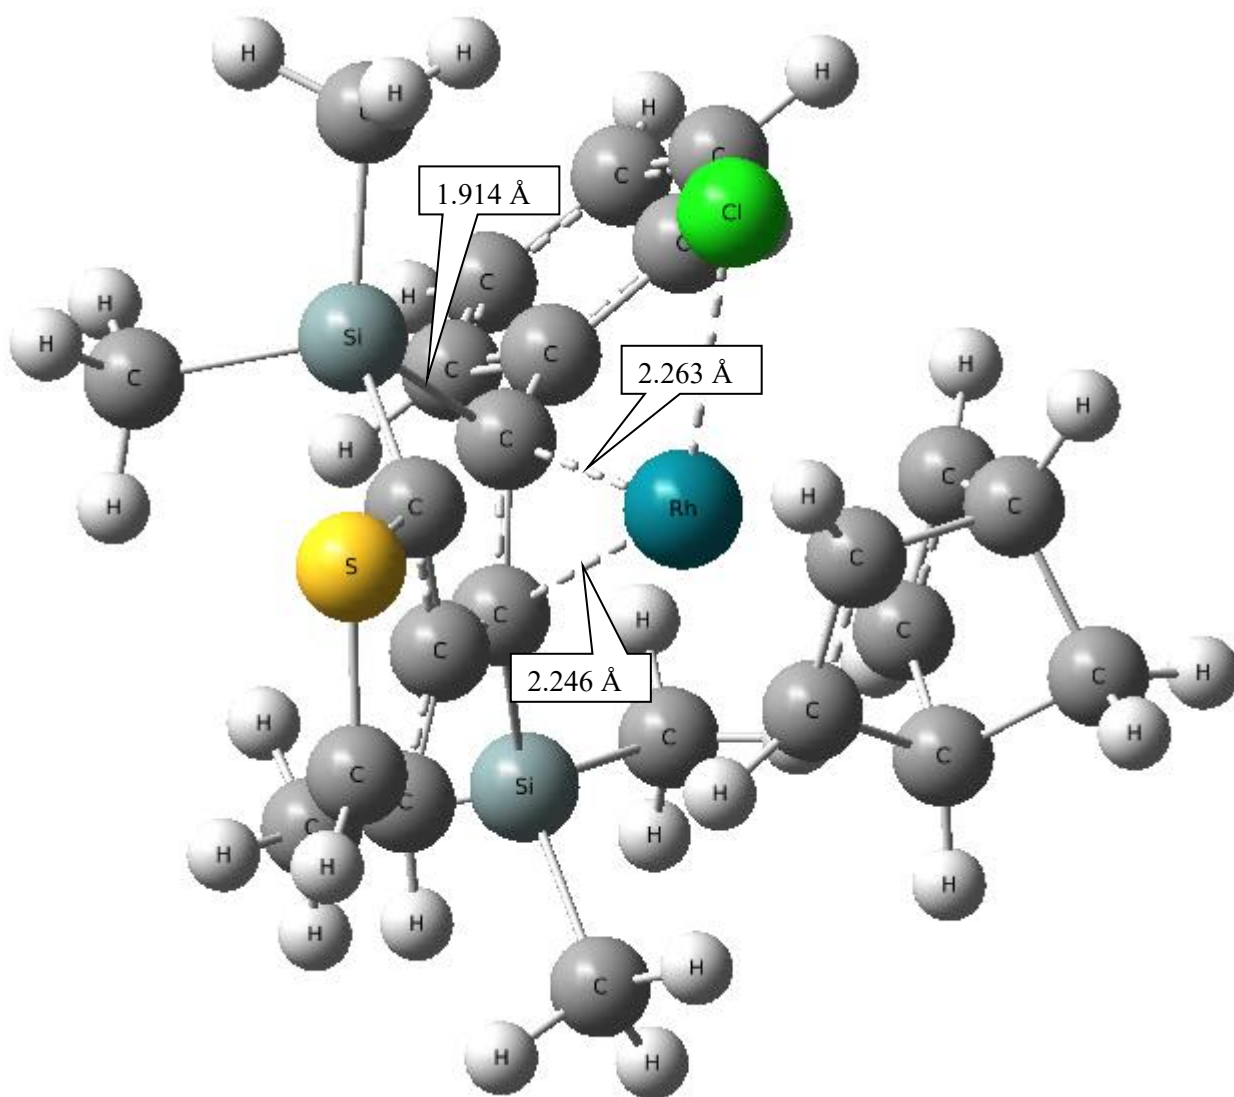

**2**+RhCl(nbd)

E(SCF) = -2479.6024 au, E(Free) = -2479.2270 au

**Figure S50.** Optimized structure for **2** + RhCl(nbd) with 6-31+G(d,p) and LanL2DZ(f) basis.
